# Supplementary material for: A molecular sphere of octahedral symmetry
Source: Royal Society of Chemistry journal article supplement (doi:10.1039/b206625b), 2002-01-01
Supplement: b206625b2.doc [file b206625b2.doc]

**A molecular sphere of octahedral symmetry**

**Dillip Kumar Chand, Kumar Biradha, Makoto Fujita,*Shigeru Sakamoto and Kentaro Yamaguchi**

# Supplementary information for the NMR data of 1 and 2, CSI-MS data of 2

**1** a partial structure of **2**

All the NMR spectra were recorded on a Bruker AMX500 spectrometer

**Figure S1**. 1H- NMR spectrum of the ligand **1** ( DMSO- d6, 25 0C, TMS).

**Figure S2**. 1H- NMR spectrum of the sphere **2** ( DMSO- d6, 25 0C, TMS).

**Figure S3**. H-H COSY NMR spectrum of the spherer **2** ( DMSO- d6, 25 0C, TMS).

**Figure S4**. NOESY NMR spectrum of the sphere **2** ( DMSO- d6, 25 0C, TMS).

**Figure S5**. 13C- NMR spectrum of the sphere **2** ( DMSO- d6, 25 0C, TMS).

**Figure S6**. DEPT- NMR spectrum of the sphere **2** ( DMSO- d6, 25 0C, TMS).

**Figure S7**. C-H COSY NMR spectrum of the sphere **2** ( DMSO- d6, 25 0C, TMS).

**Figure S8**. CSI-MS of the sphere **2**.


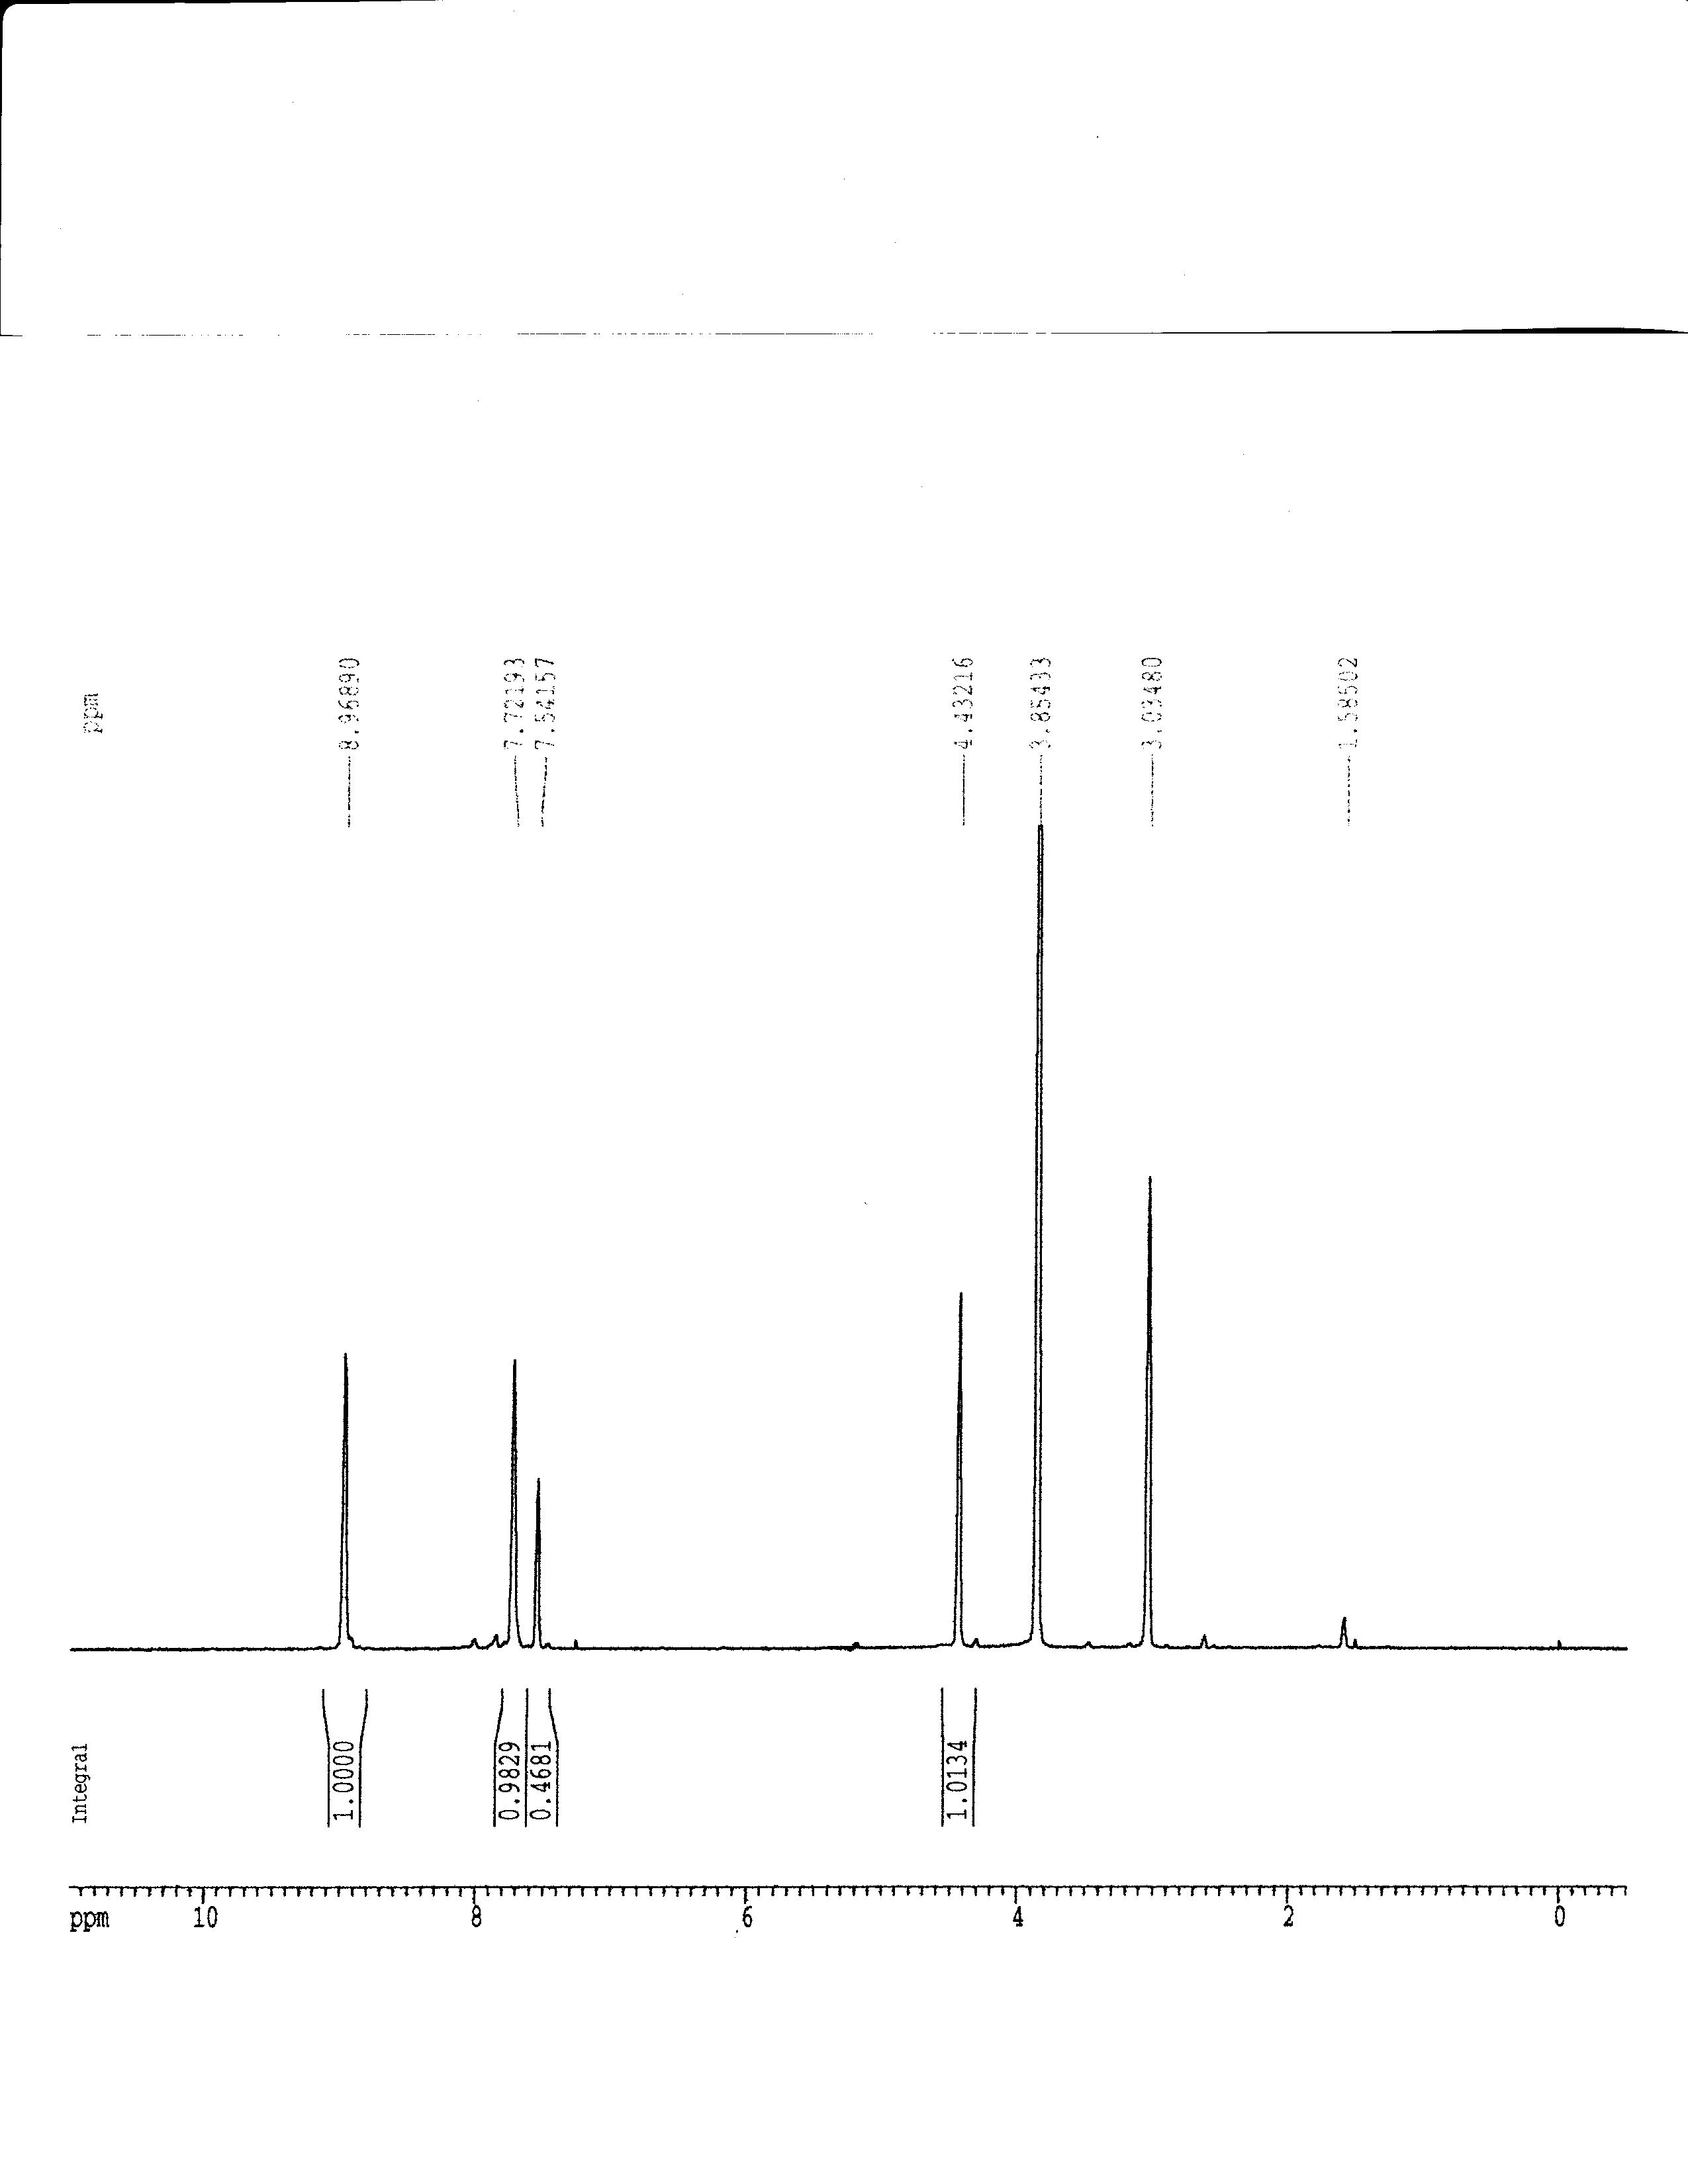


***absorbed***

***water***

***a b DMSO-d6***

***c d***

**Figure S1**. 1H- NMR spectrum of the ligand **1** ( DMSO- d6, 25 0C, TMS).


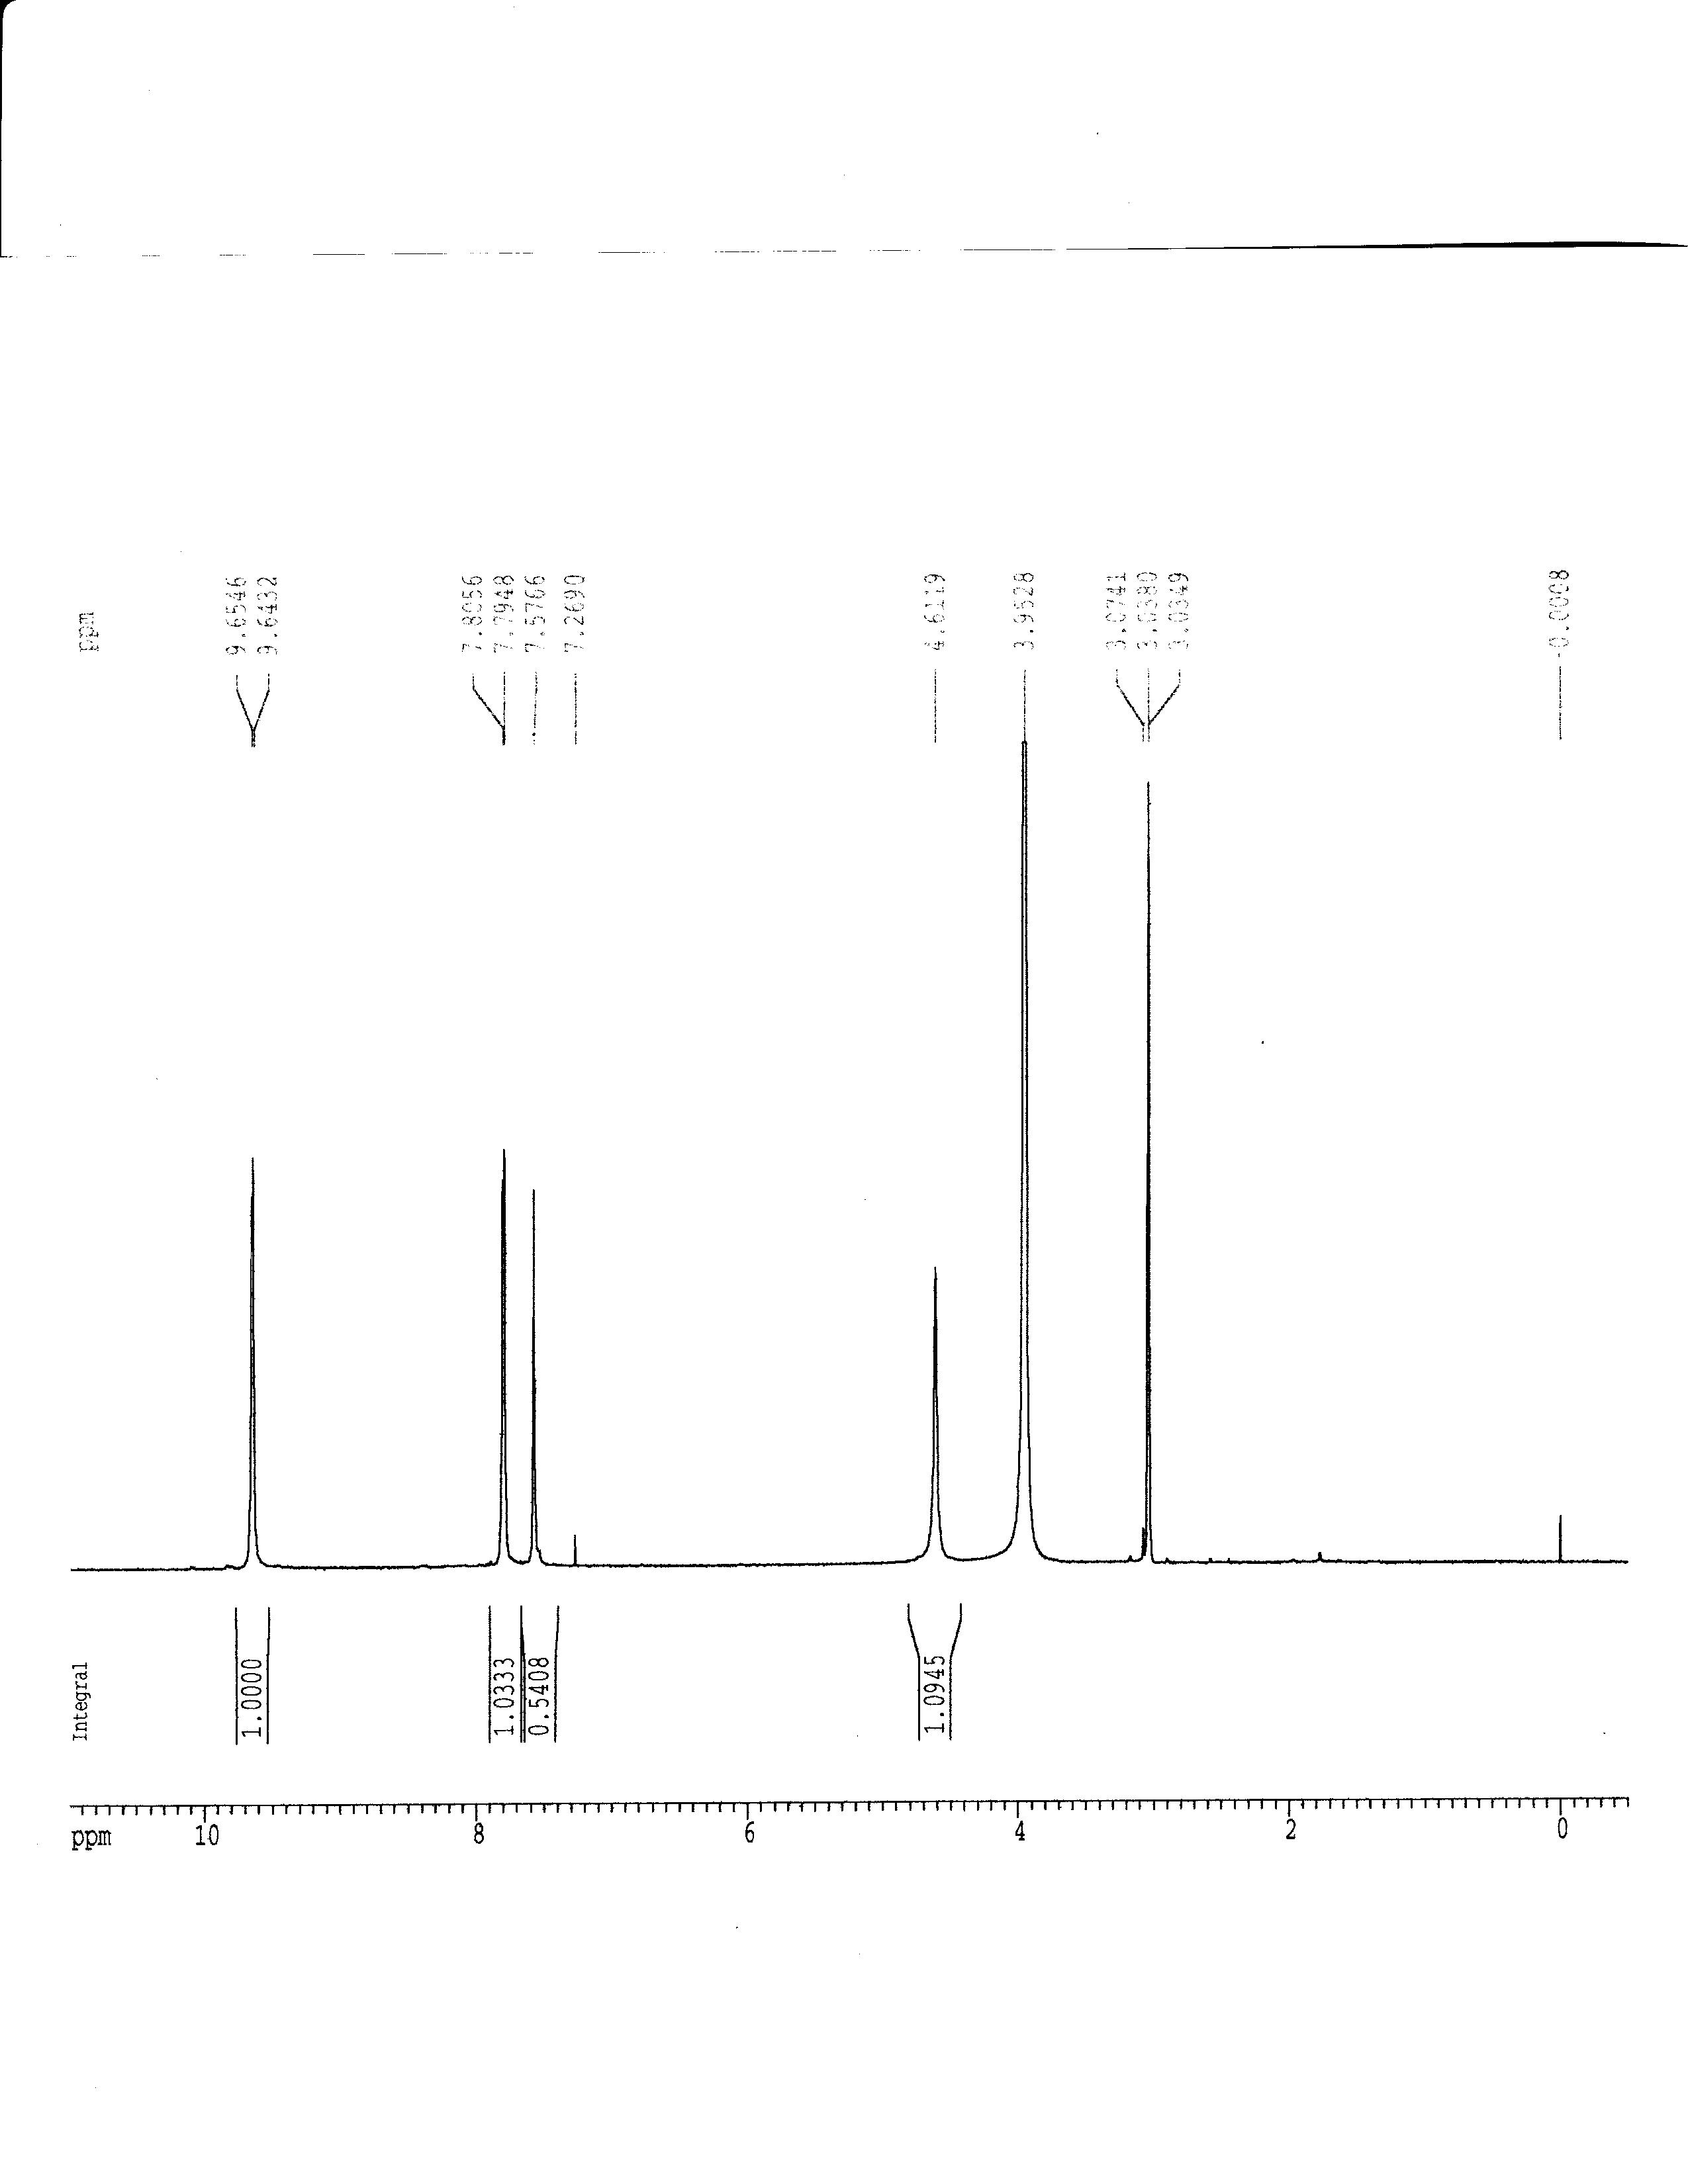


***absorbed***

***water***

***a b DMSO-d6***

***c d***

**Figure S2**. 1H- NMR spectrum of the sphere **2** ( DMSO- d6, 25 0C, TMS).


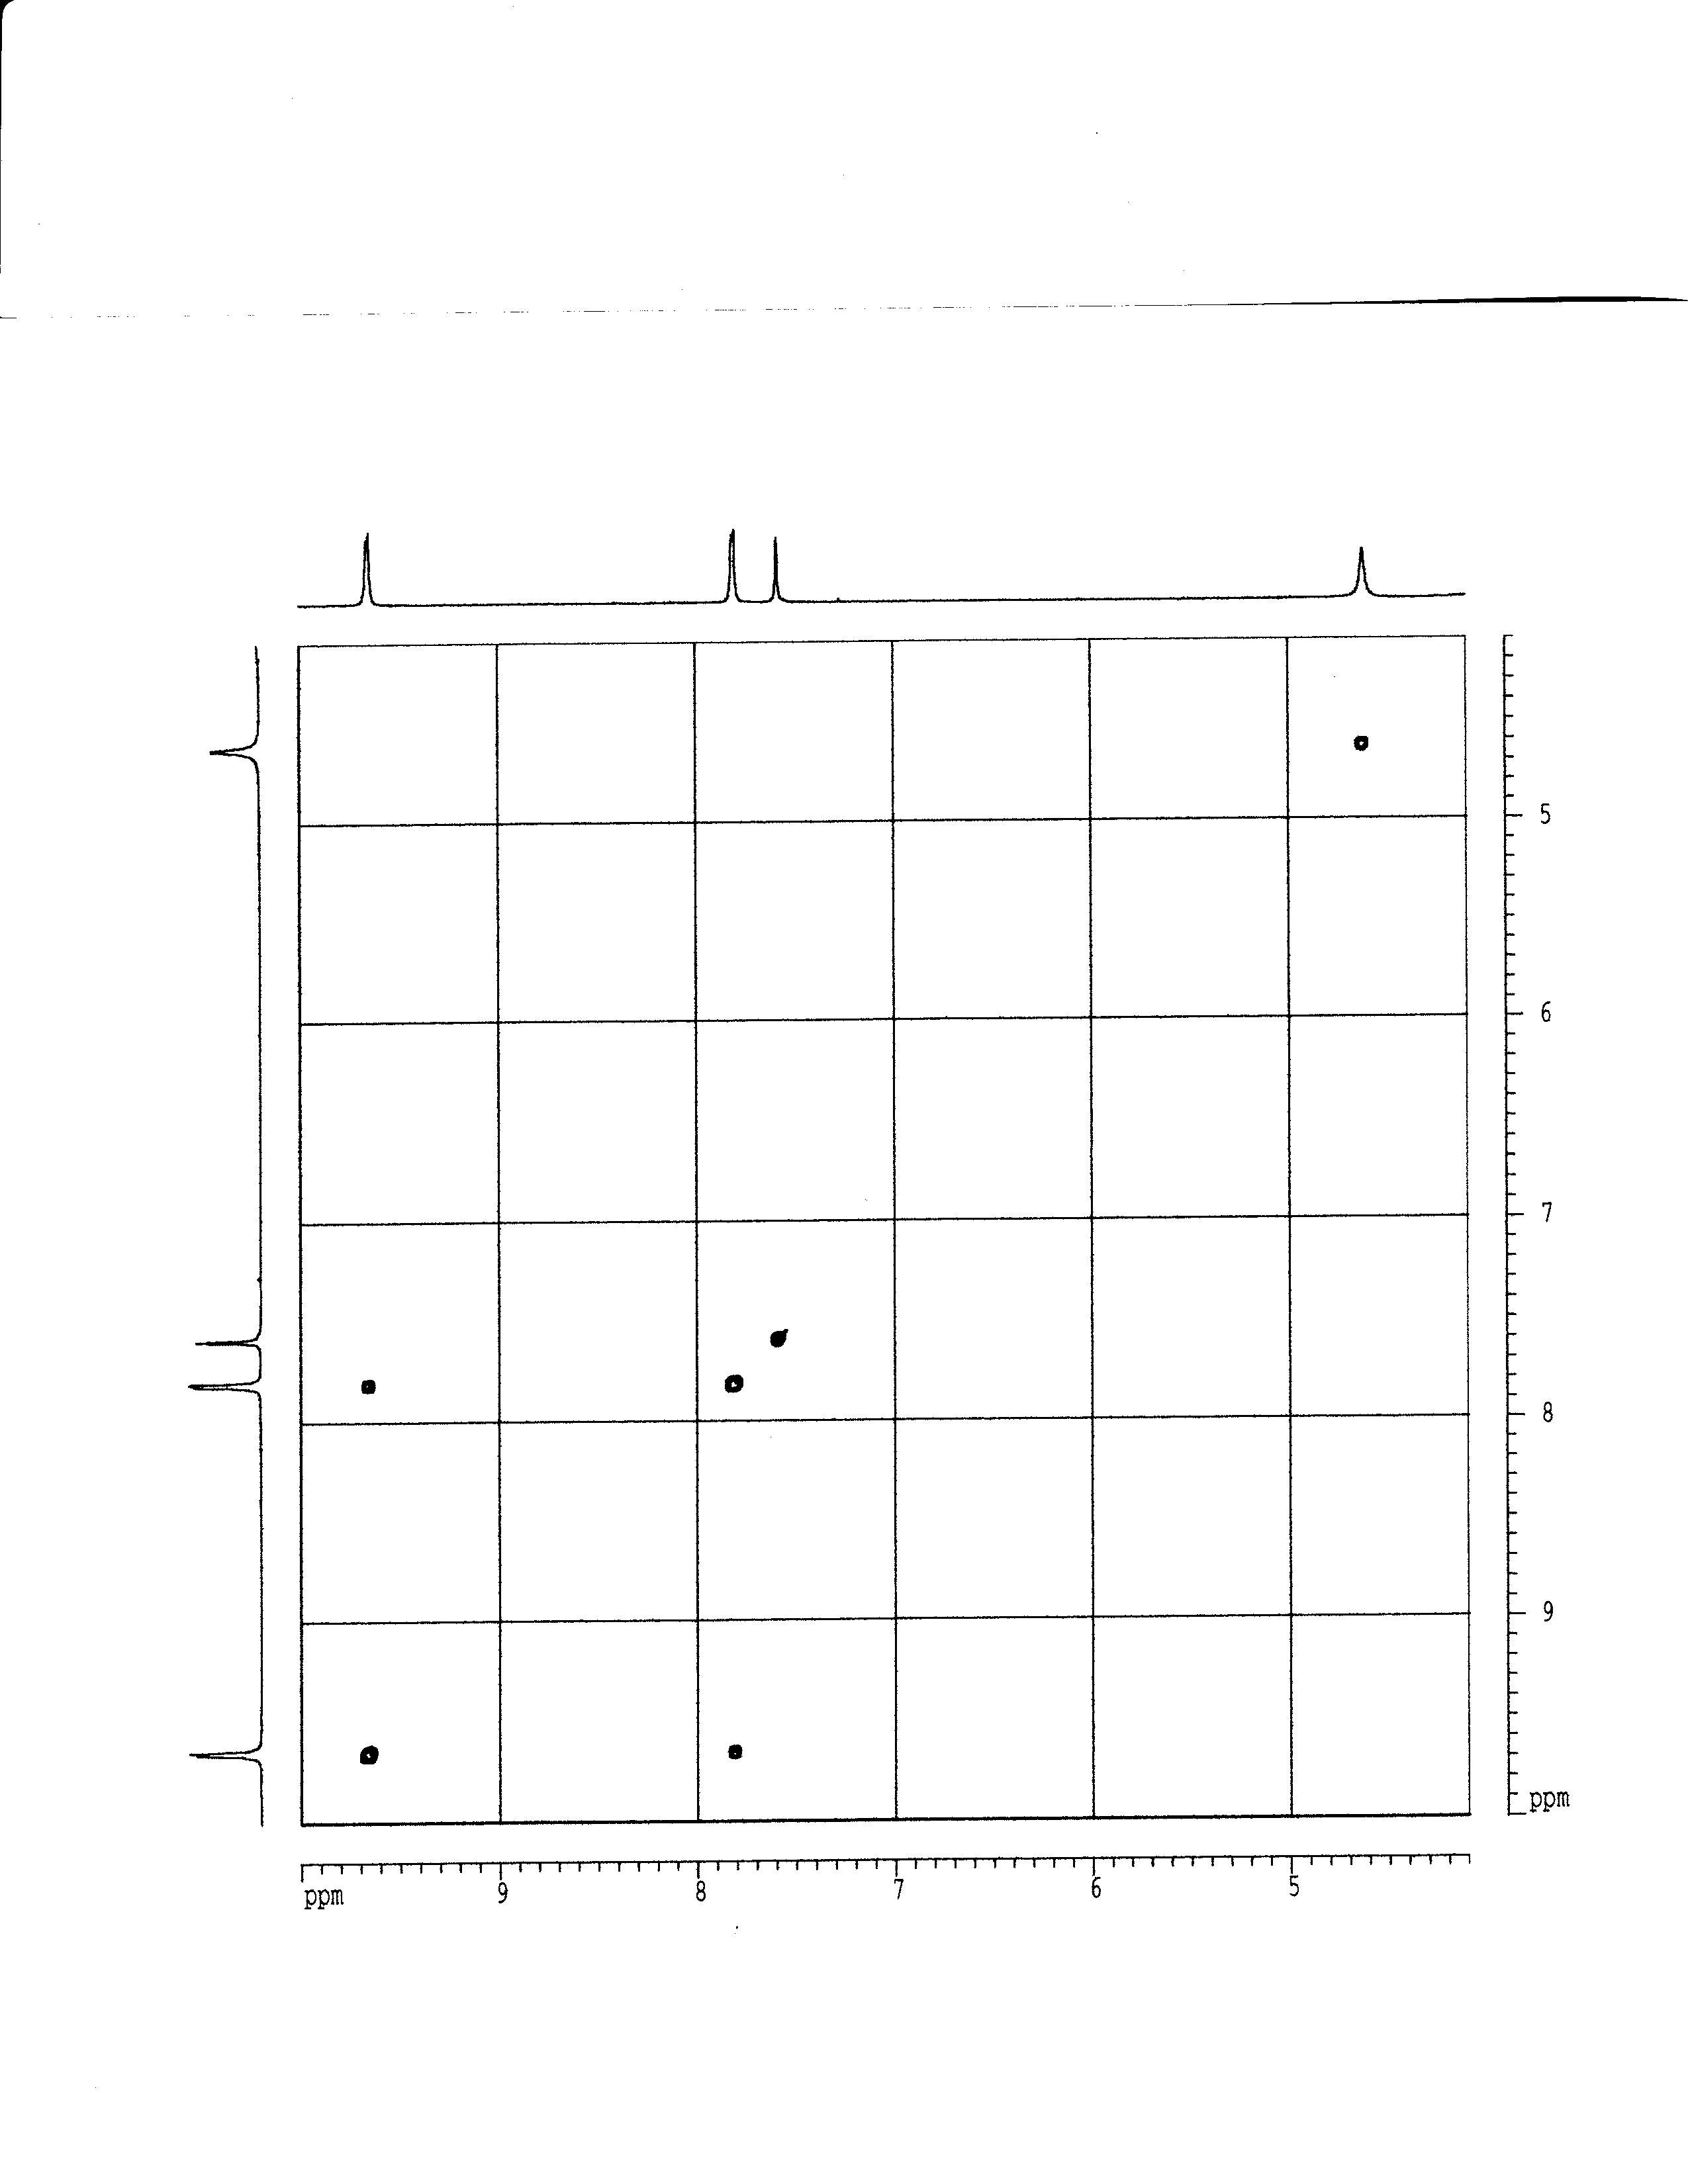


***a b c d***

***a b c d***

**Figure S3**. H-H COSY NMR spectrum of the spherer **2** ( DMSO- d6, 25 0C, TMS).


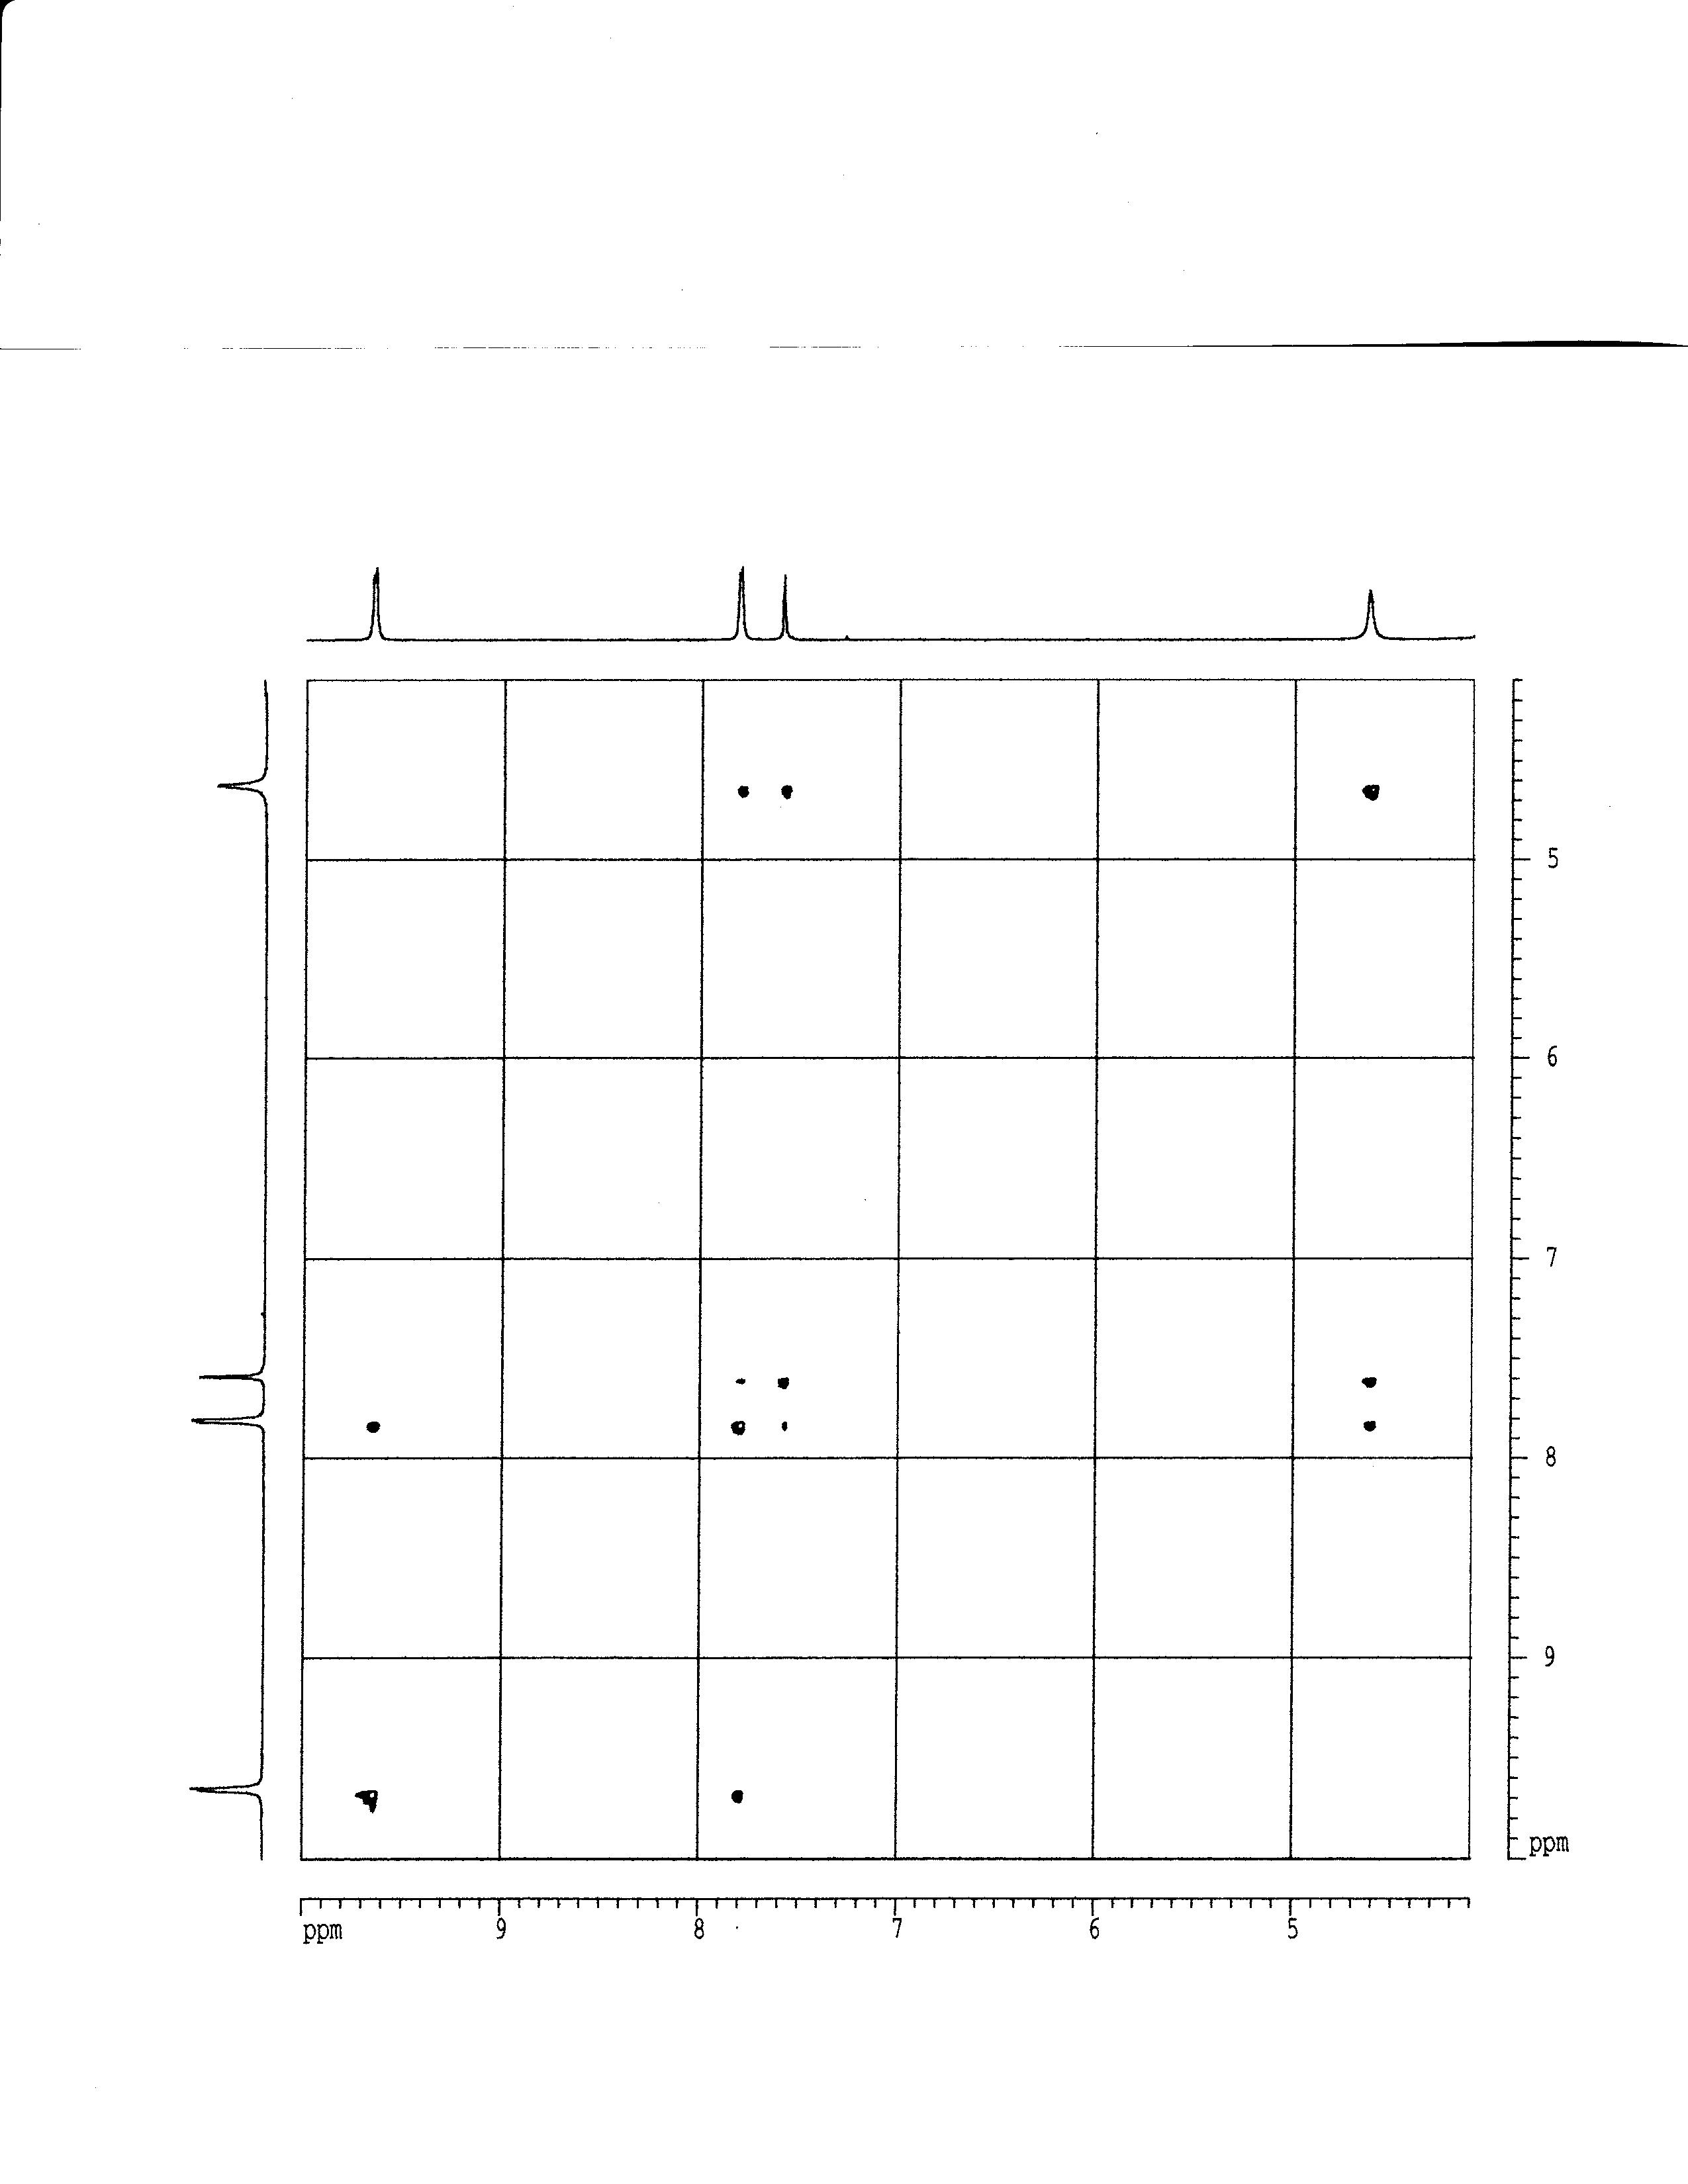


***a b c d***

***a b c d***

**Figure S4**. NOESY NMR spectrum of the sphere **2** ( DMSO- d6, 25 0C, TMS).


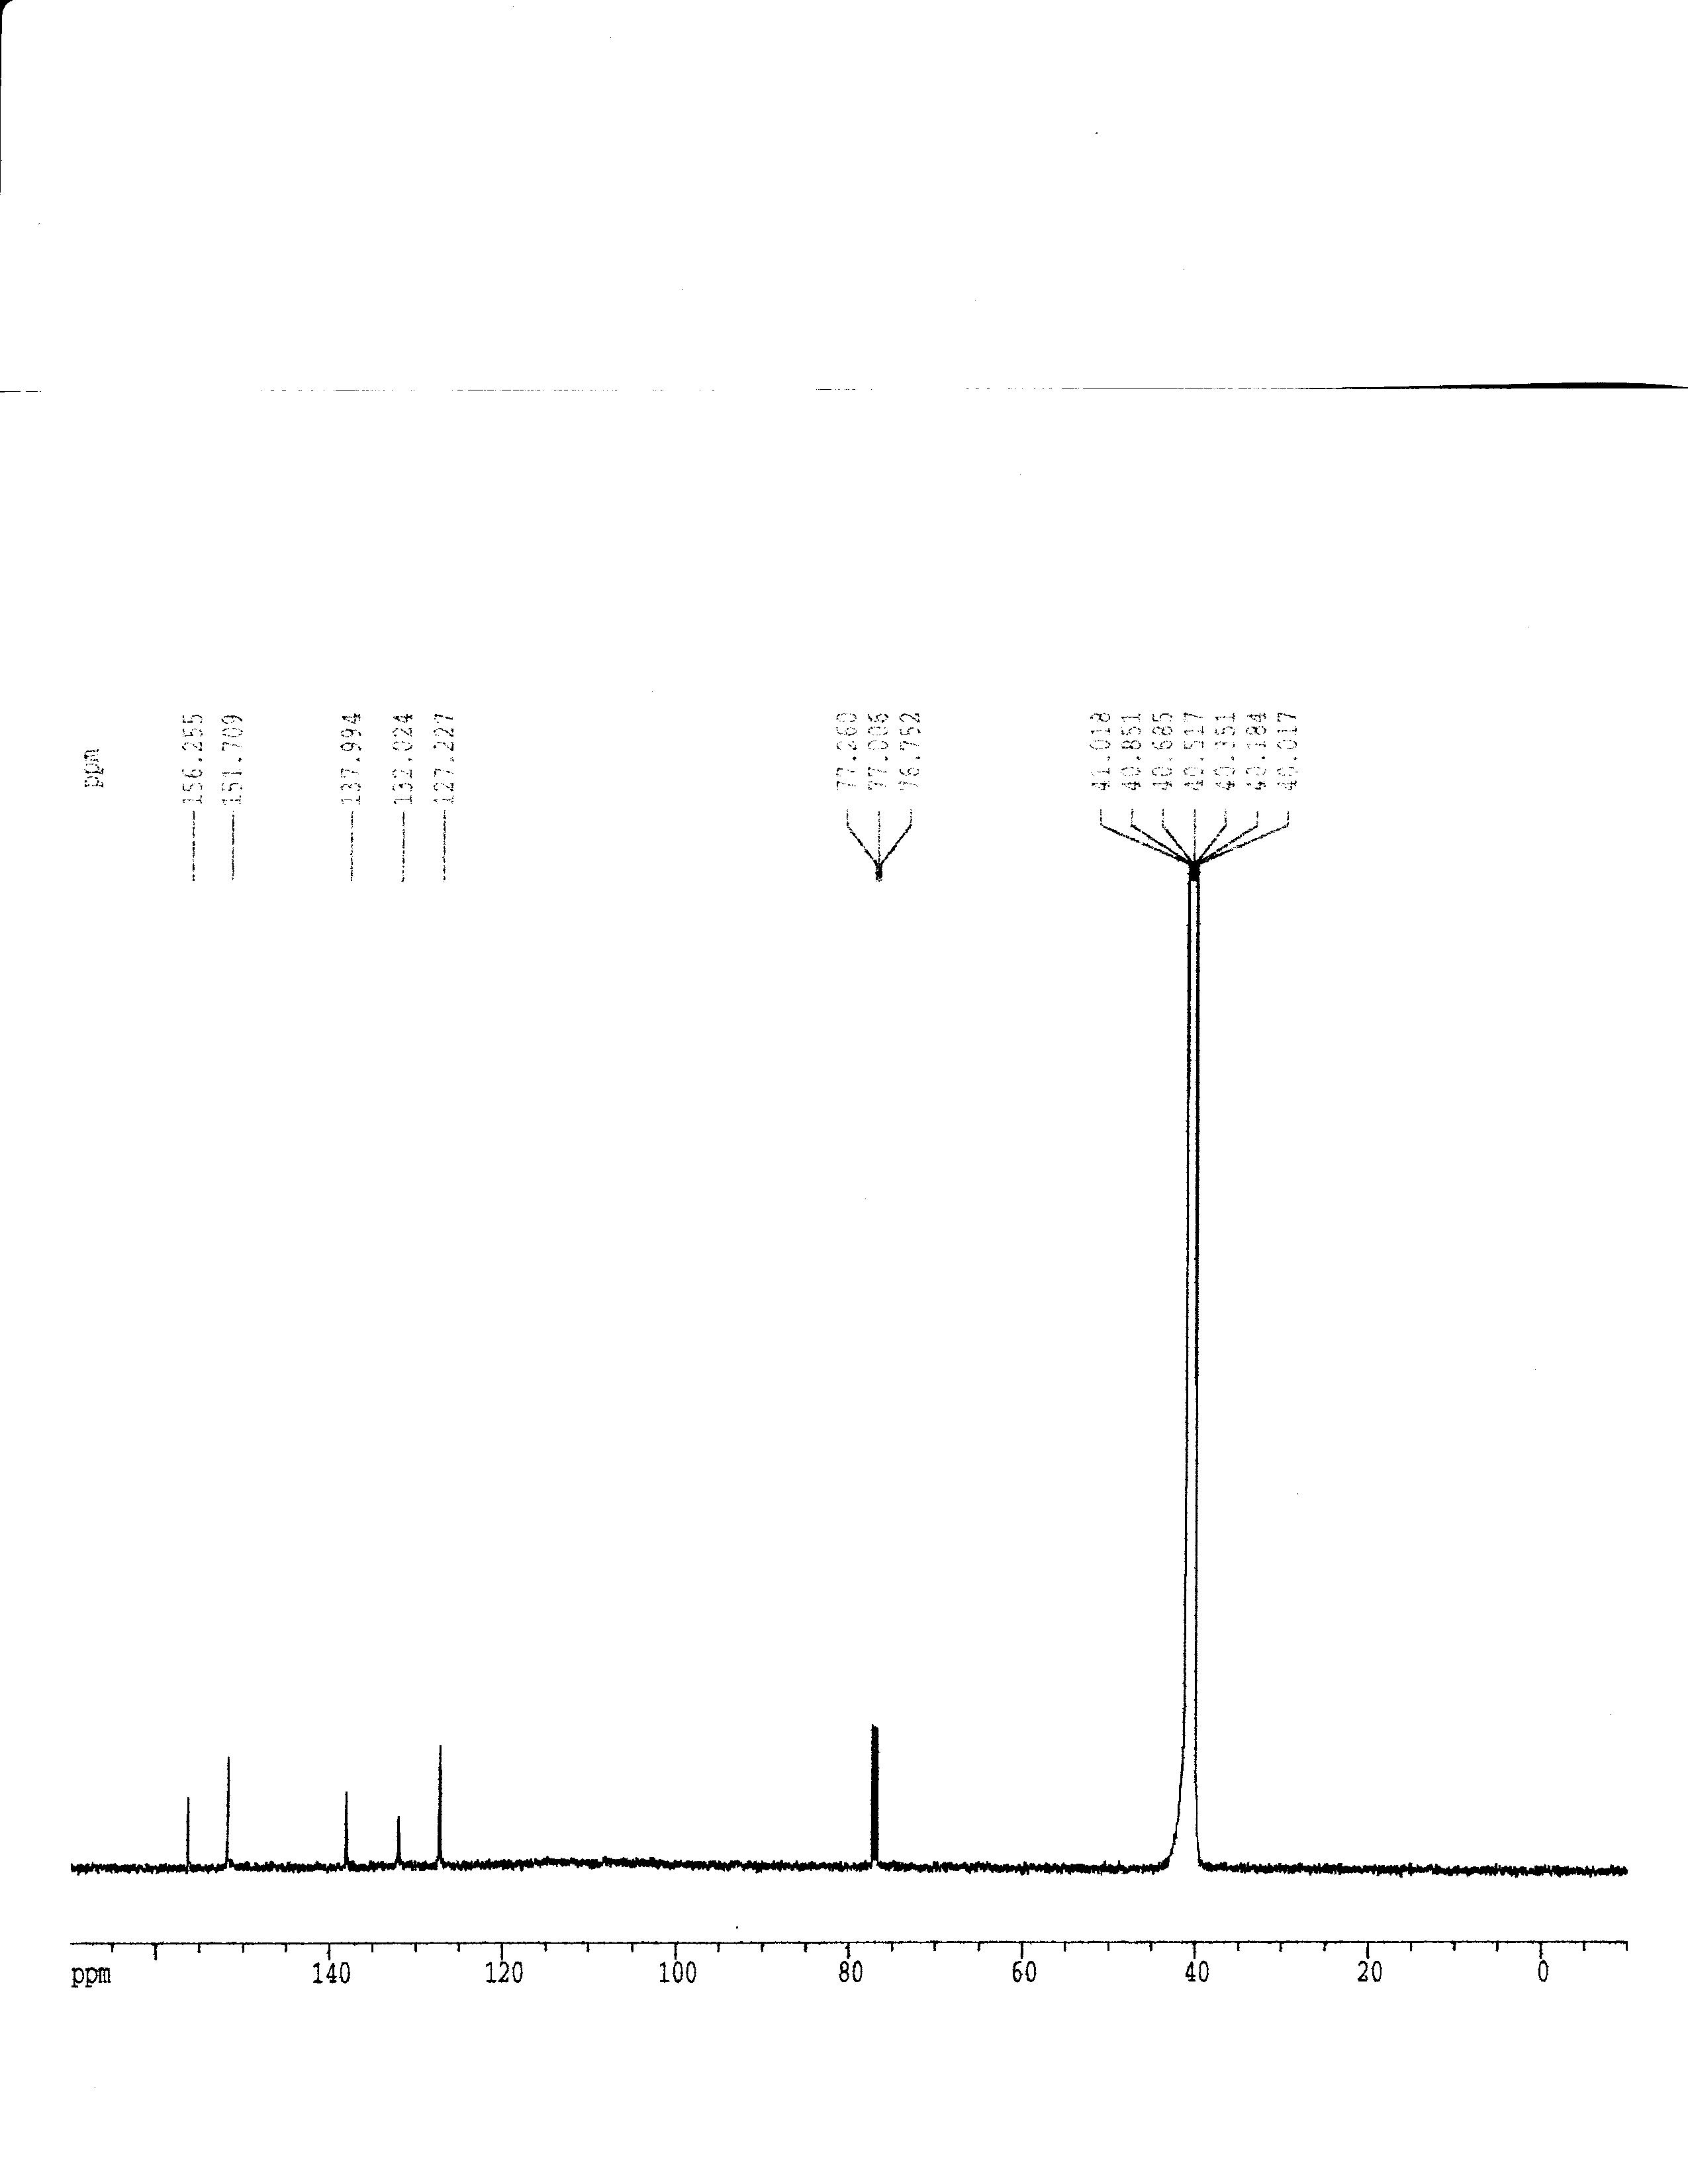


***a Cq CDCl3***

***Cq c b external d + DMSO-d6***

**Figure S5**. 13C- NMR spectrum of the sphere **2** ( DMSO- d6, 25 0C, TMS).


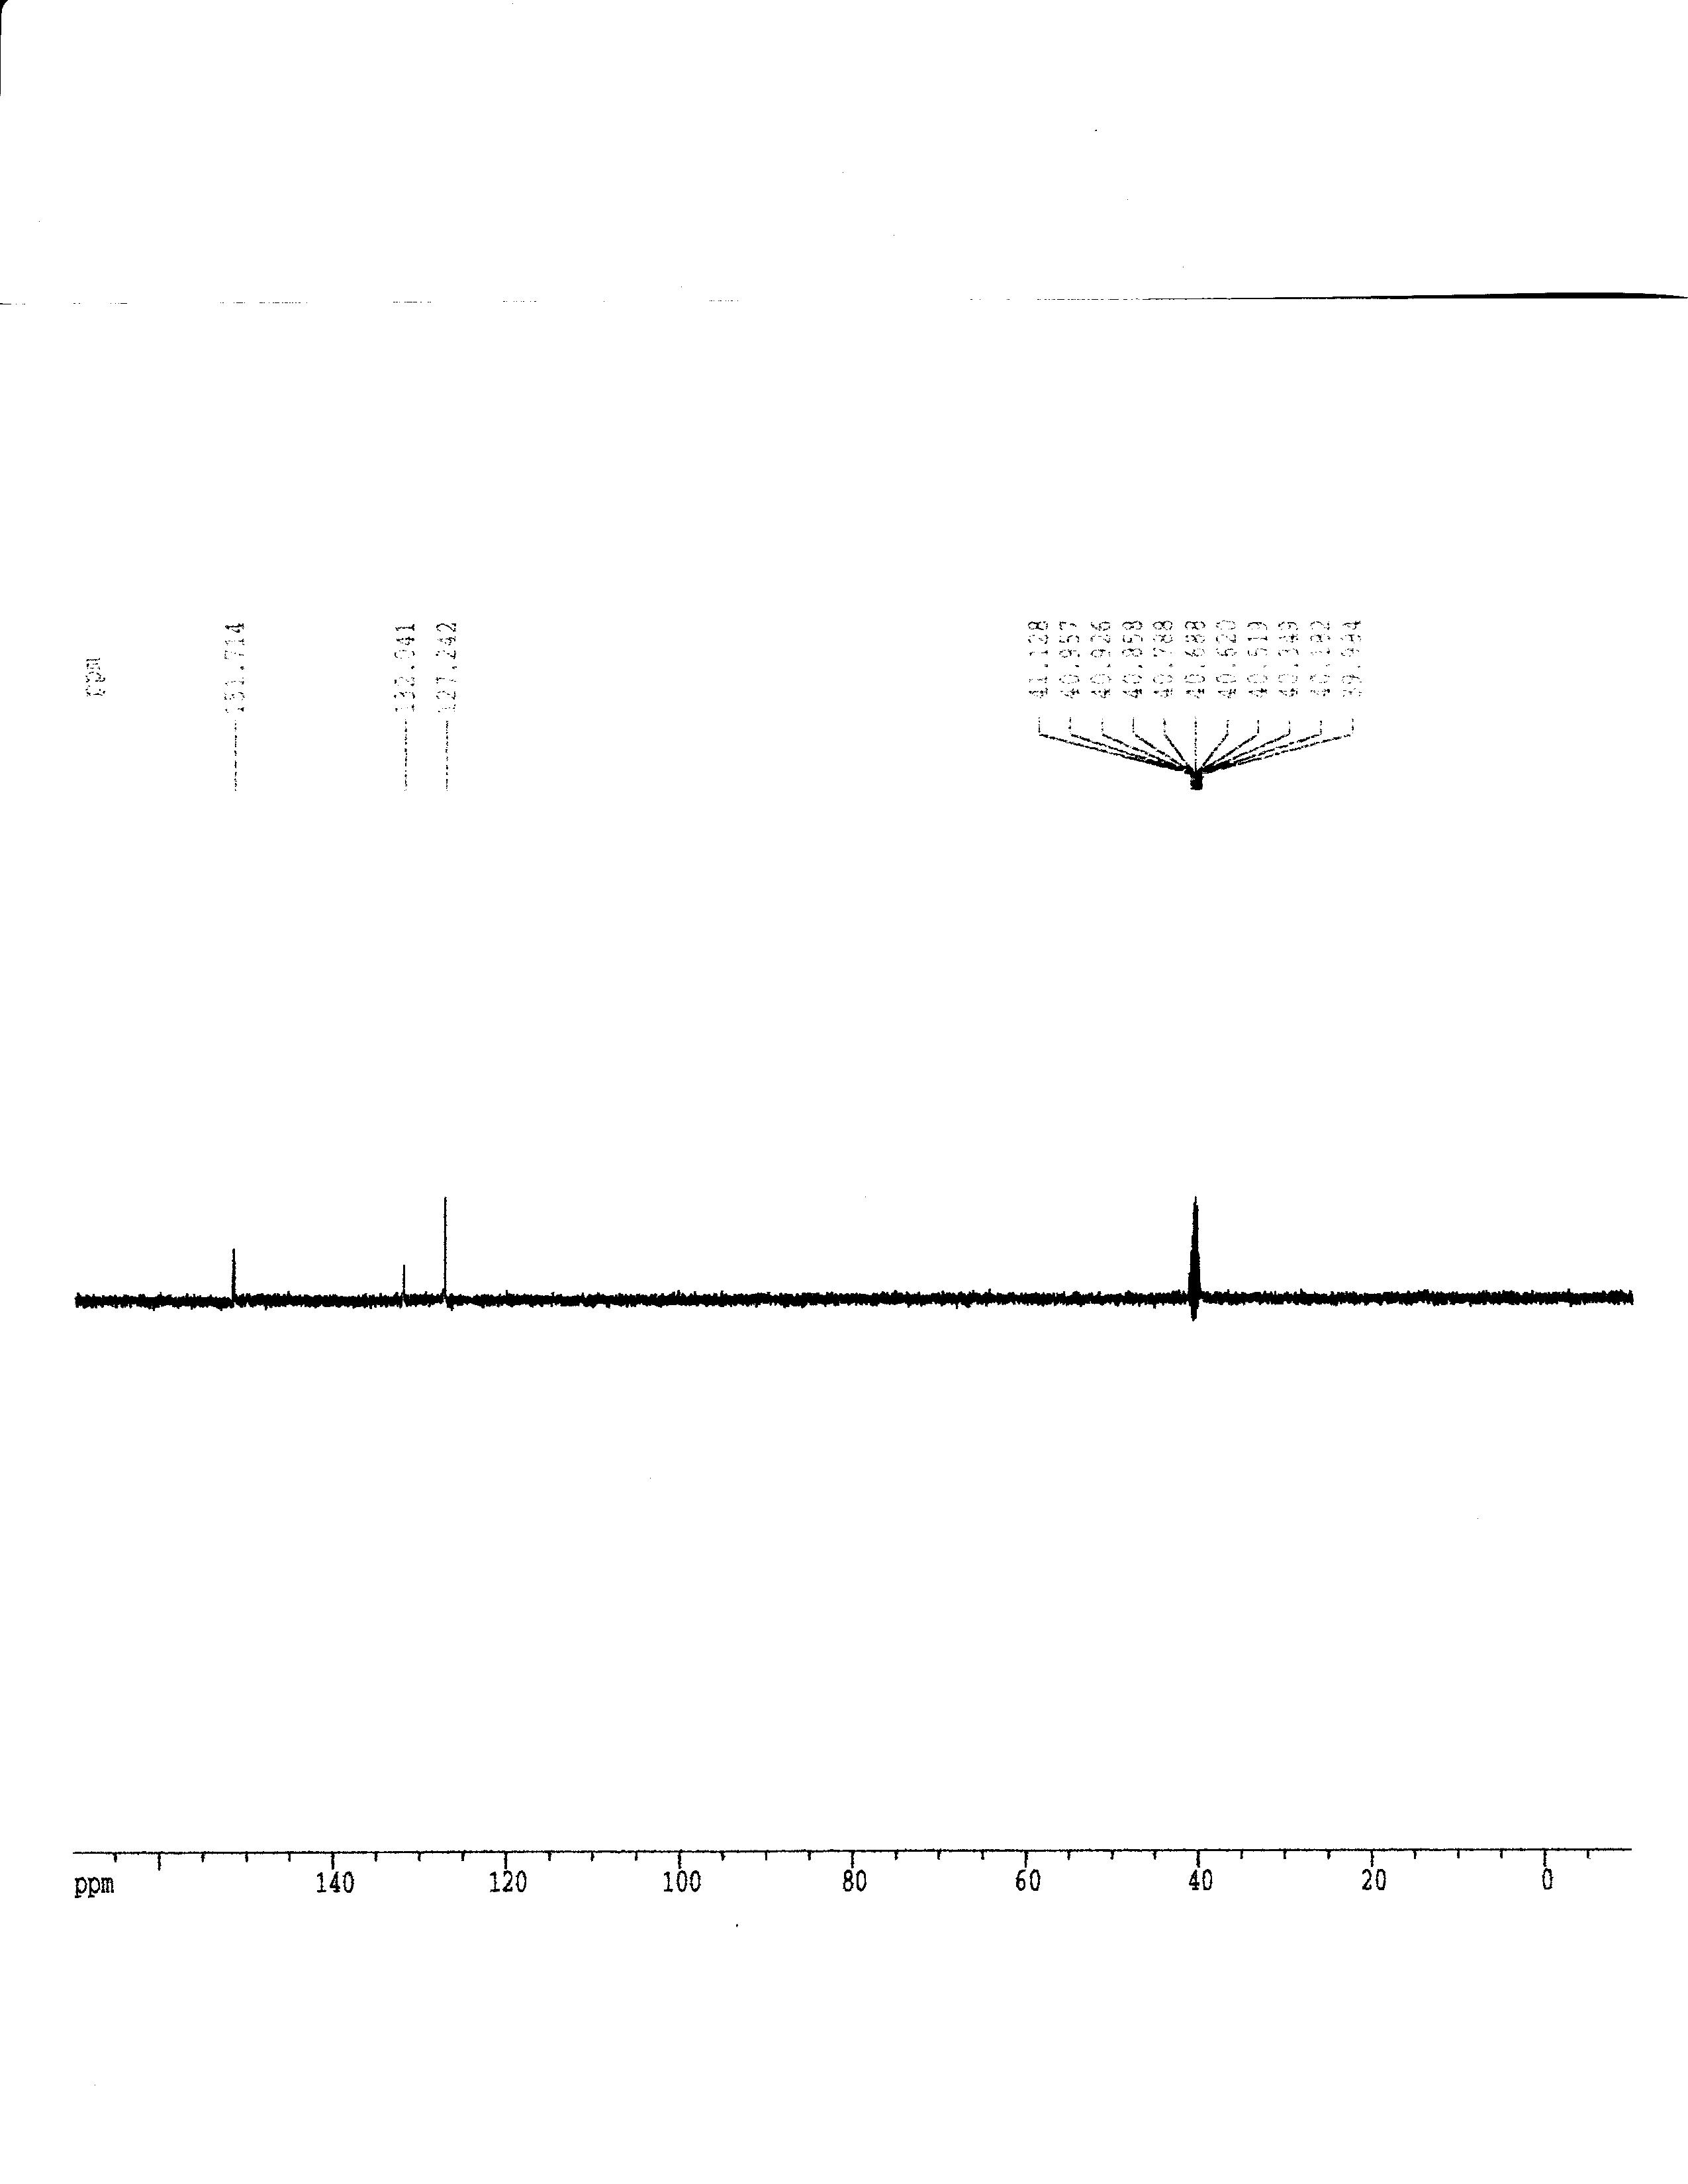


***b d + DMSO-d6***

***a c***

**Figure S6**. DEPT- NMR spectrum of the sphere **2** ( DMSO-d6, 25 0C, TMS).


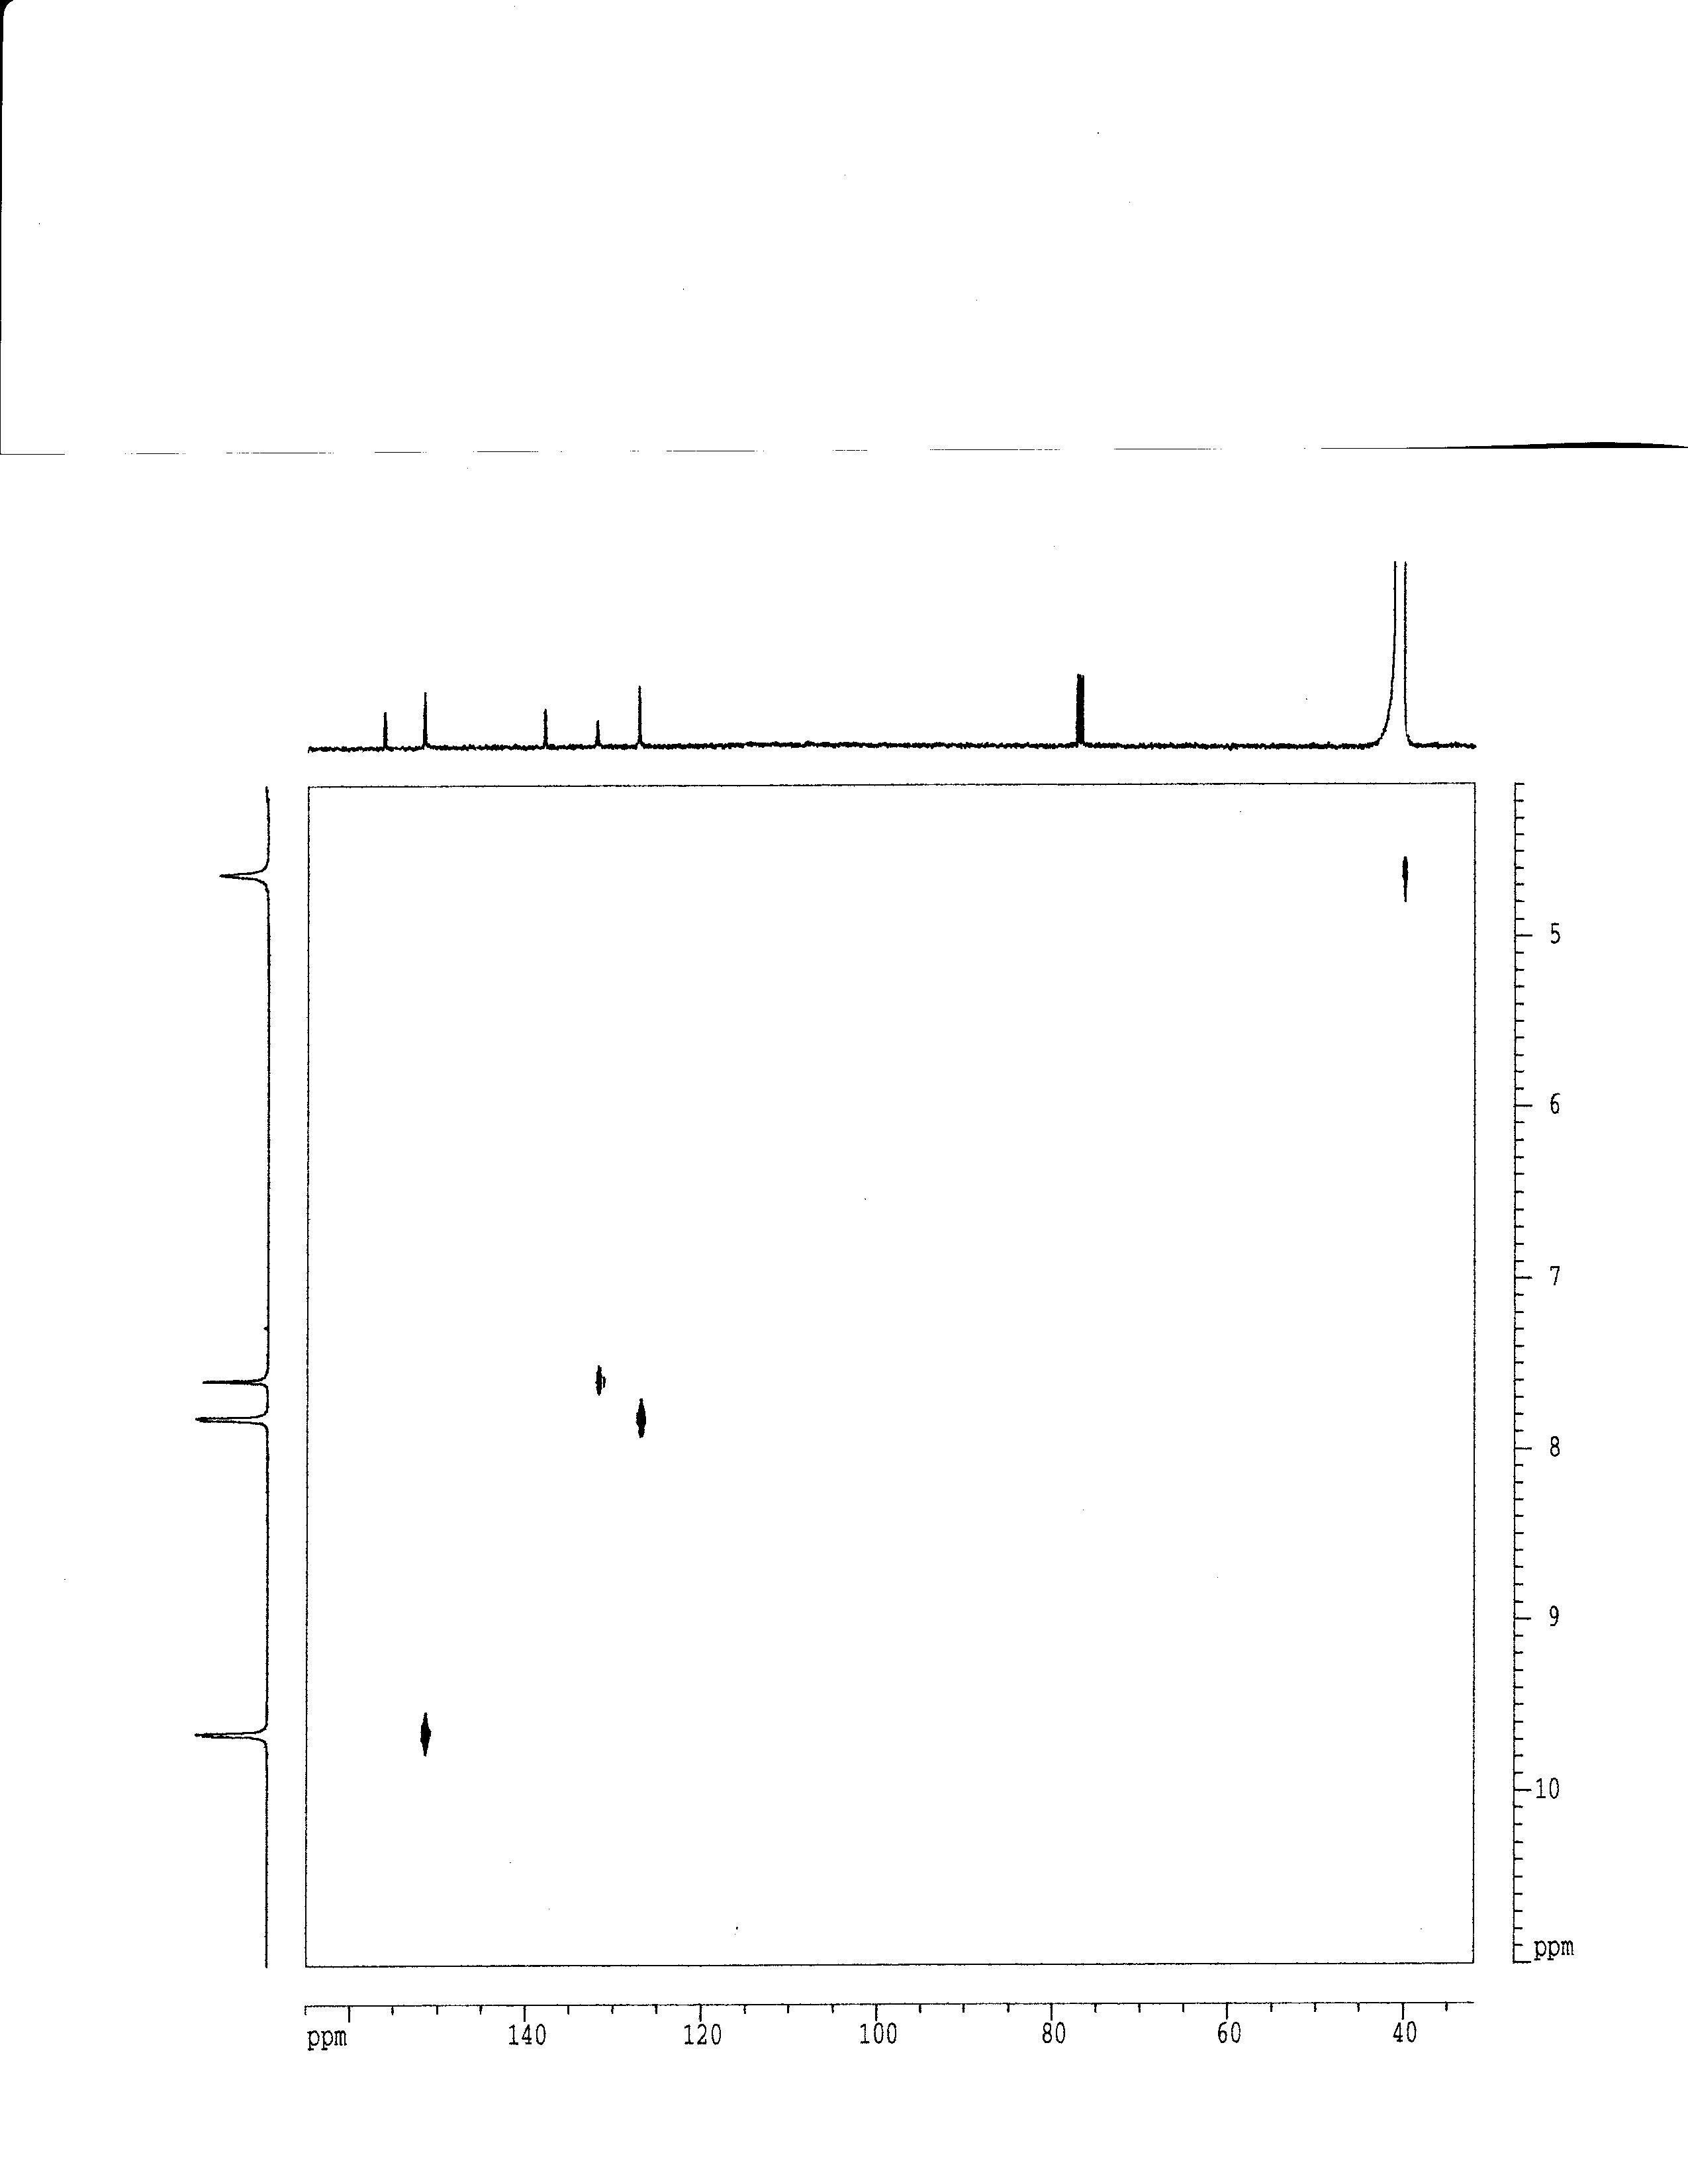


***a b c d***

***a Cq CDCl3***

***Cq c b external d + DMSO-d6***

**Figure S7**. C-H COSY NMR spectrum of the sphere **2** ( DMSO-d6, 25 0C, TMS).

**Fig S8 (a)**

700 701 702 703 *m/Z*


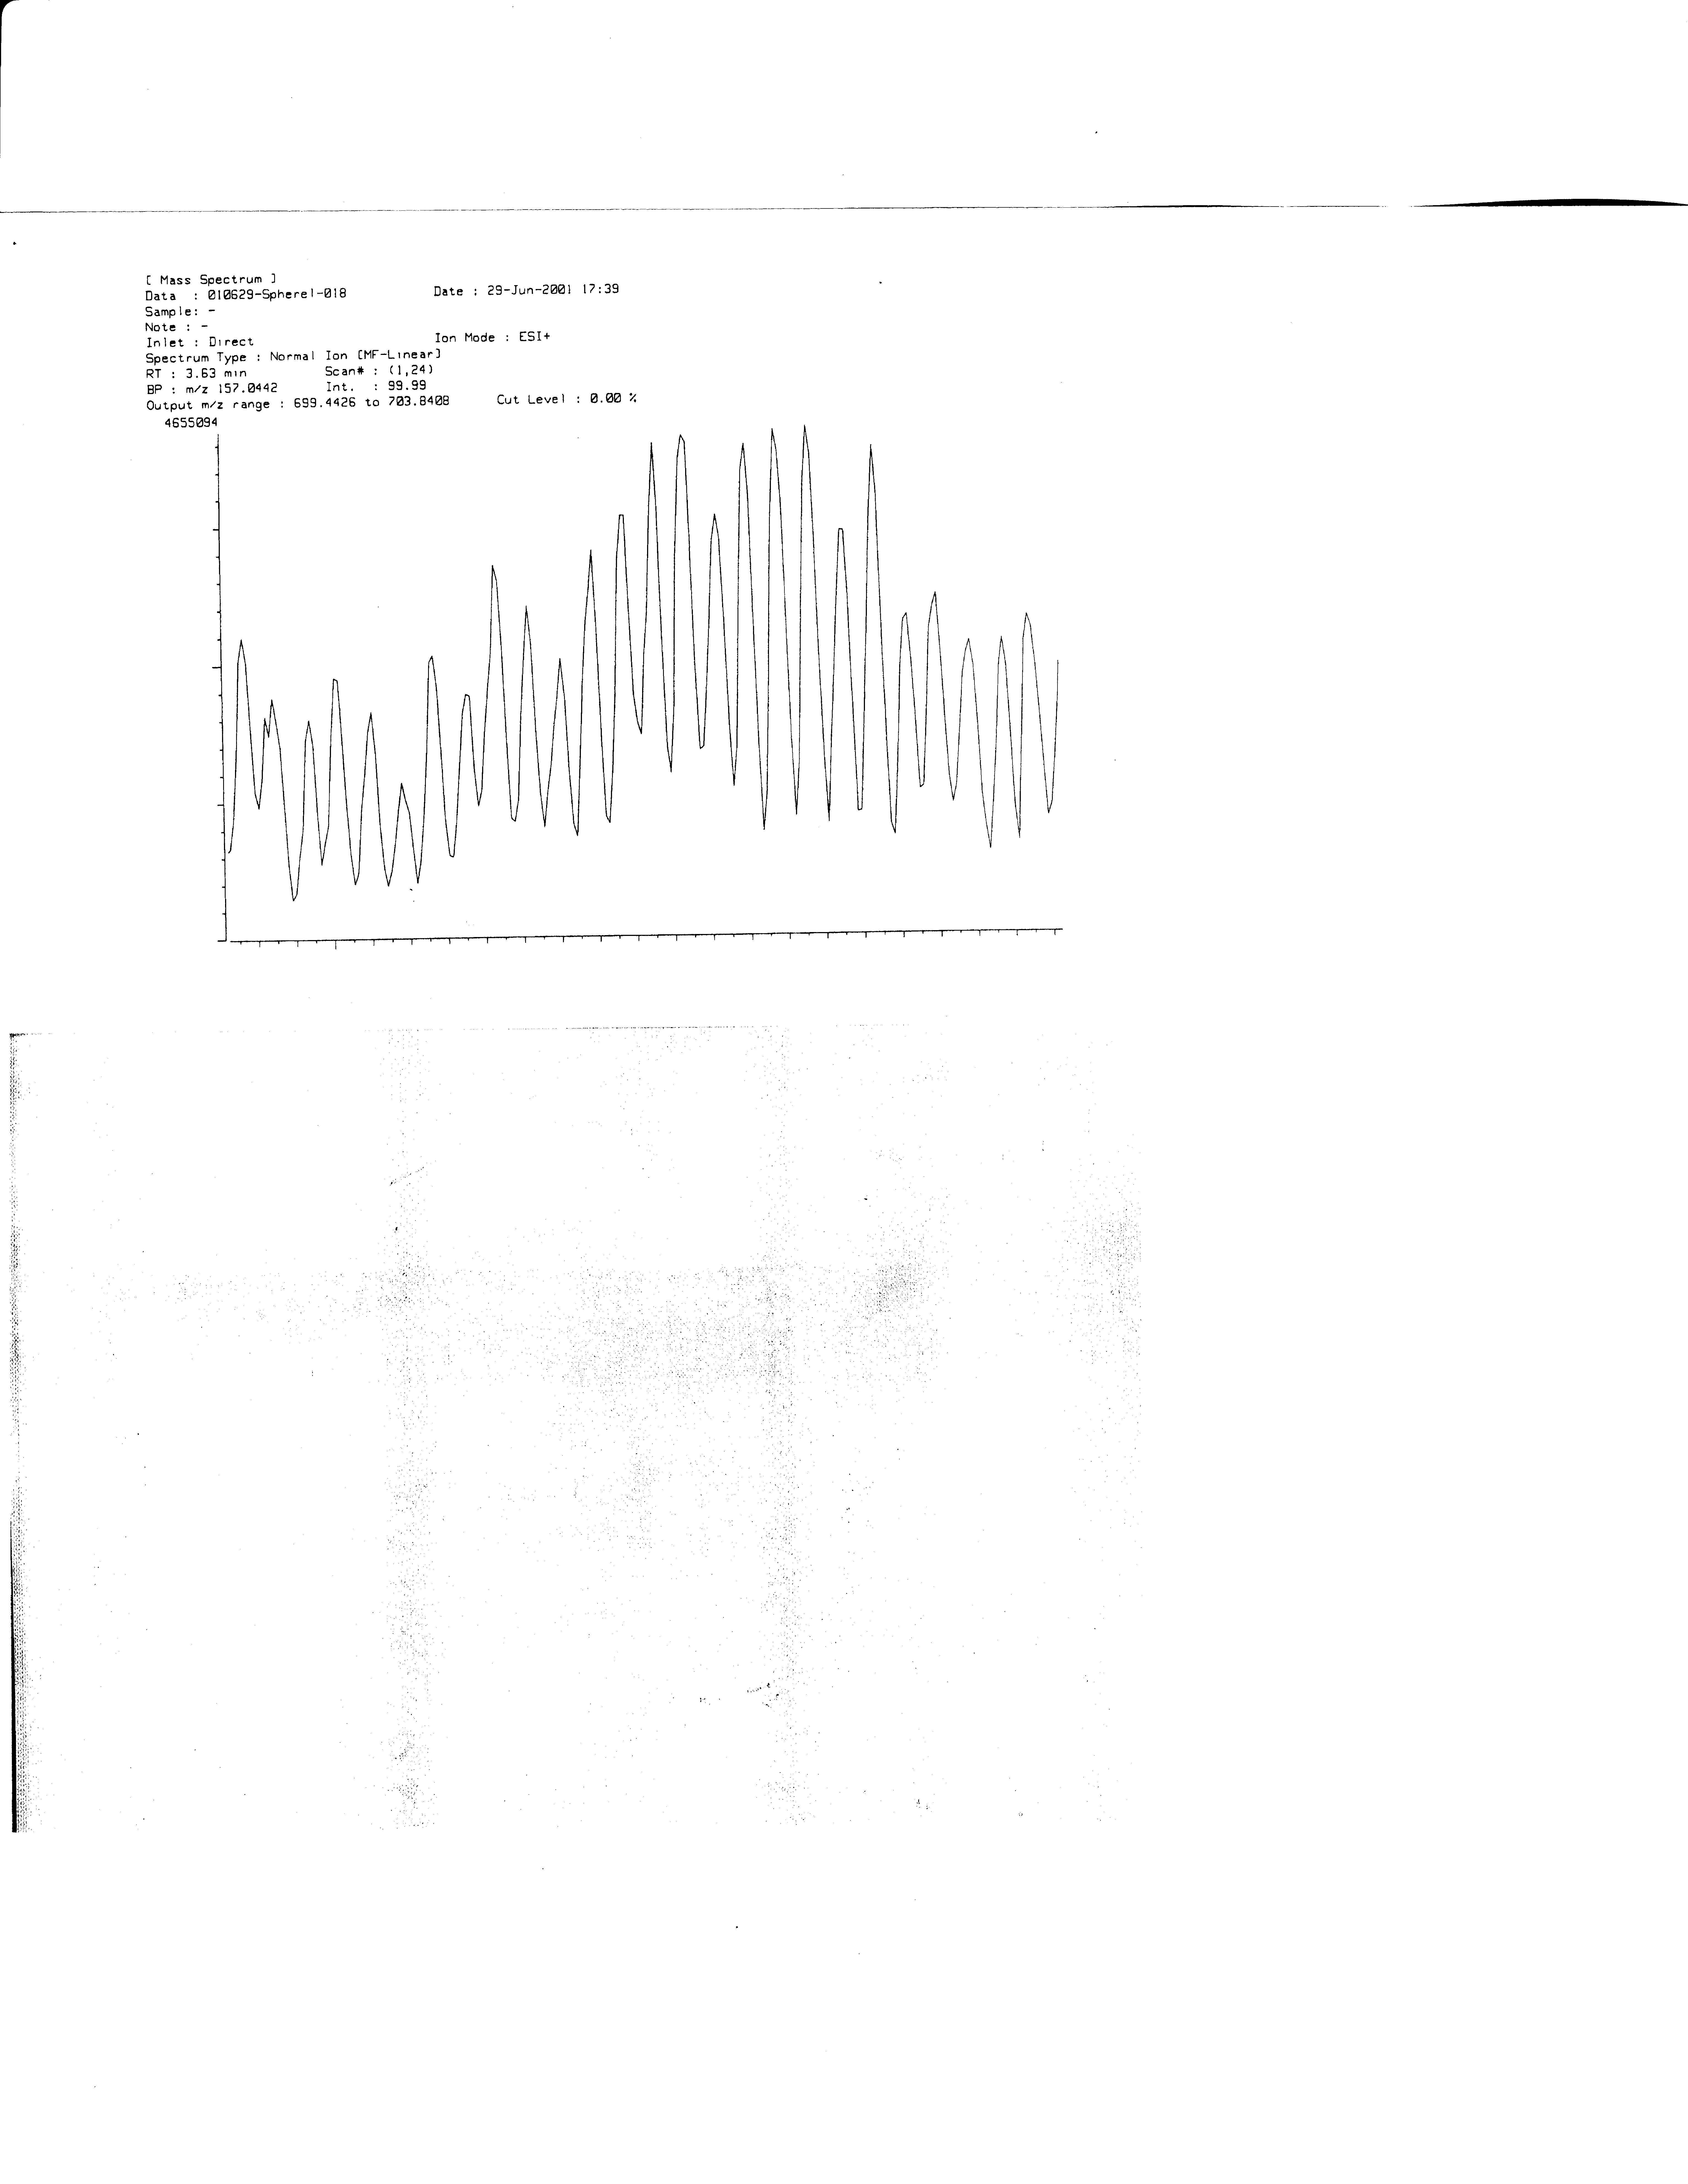


Relative intensity

0 5 10 15

*m/z* = 701

[(**2**-(NO3)6)+5 DMSO]6+

**Fig S8 (b)**

773 775 777 779 *m/Z*


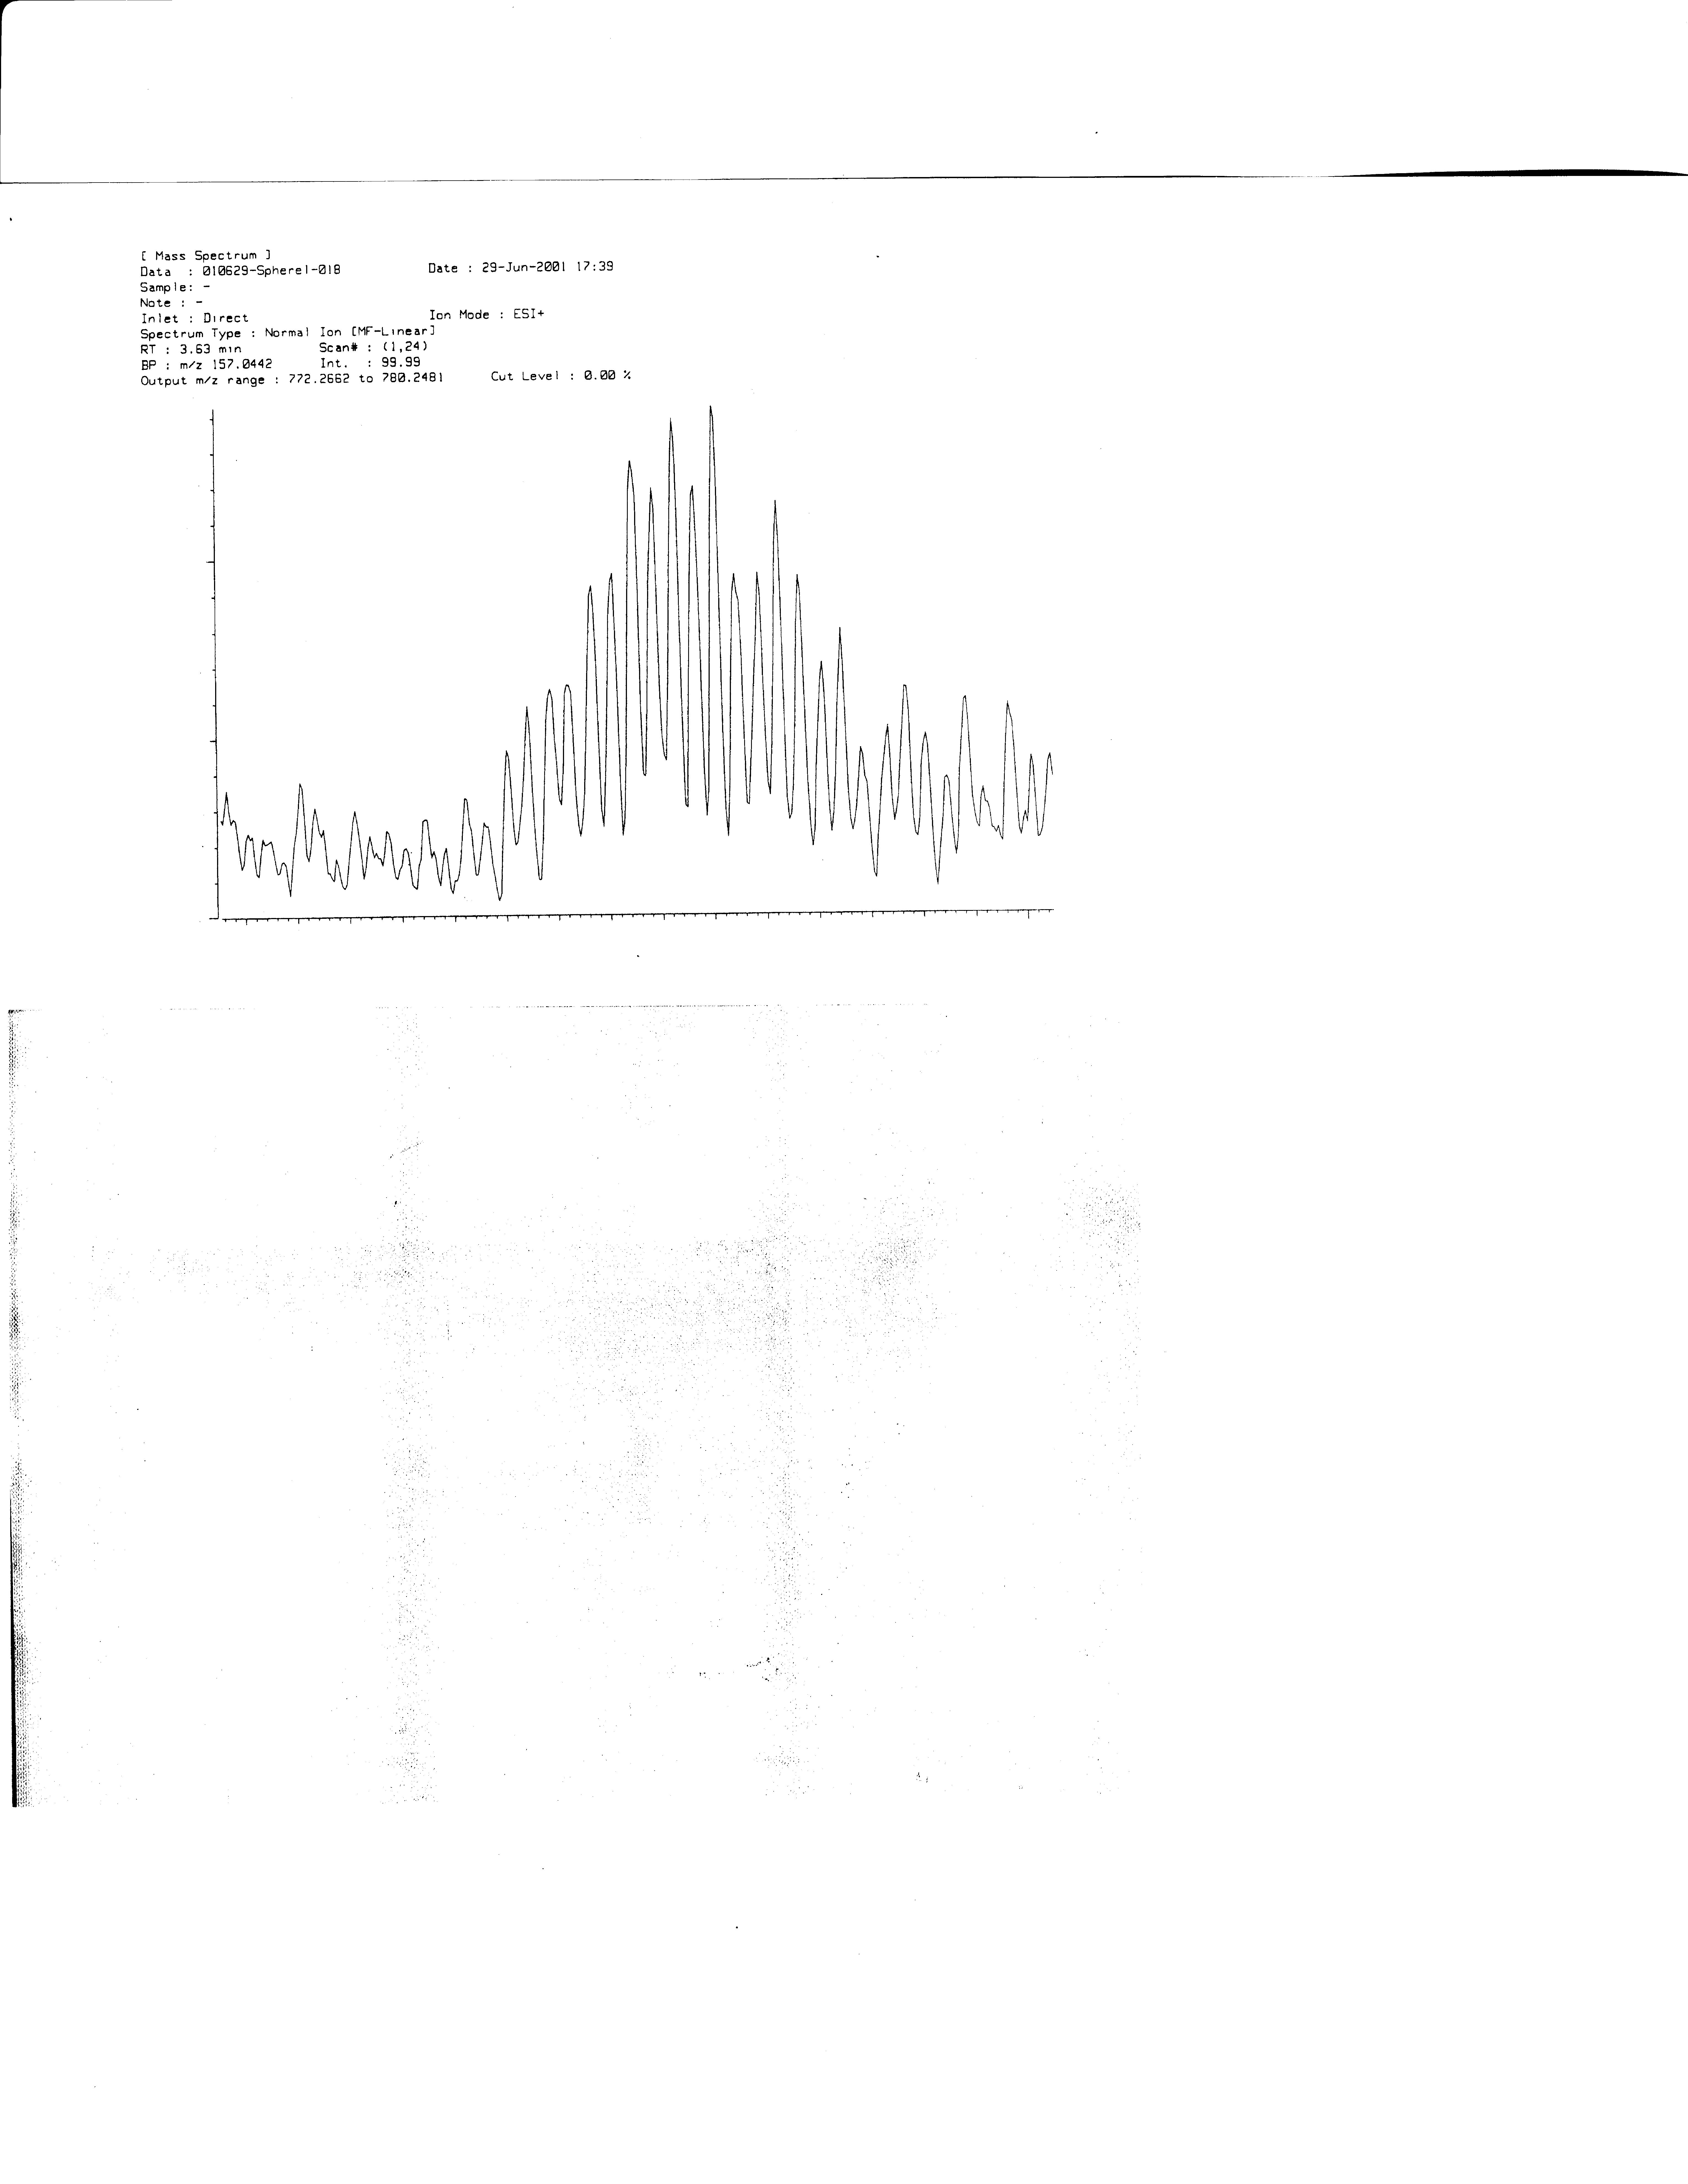


Relative intensity

0 10 20 30

*m/z* = 776

[**2**-(NO3)5]5+

**Fig S8 (c)**


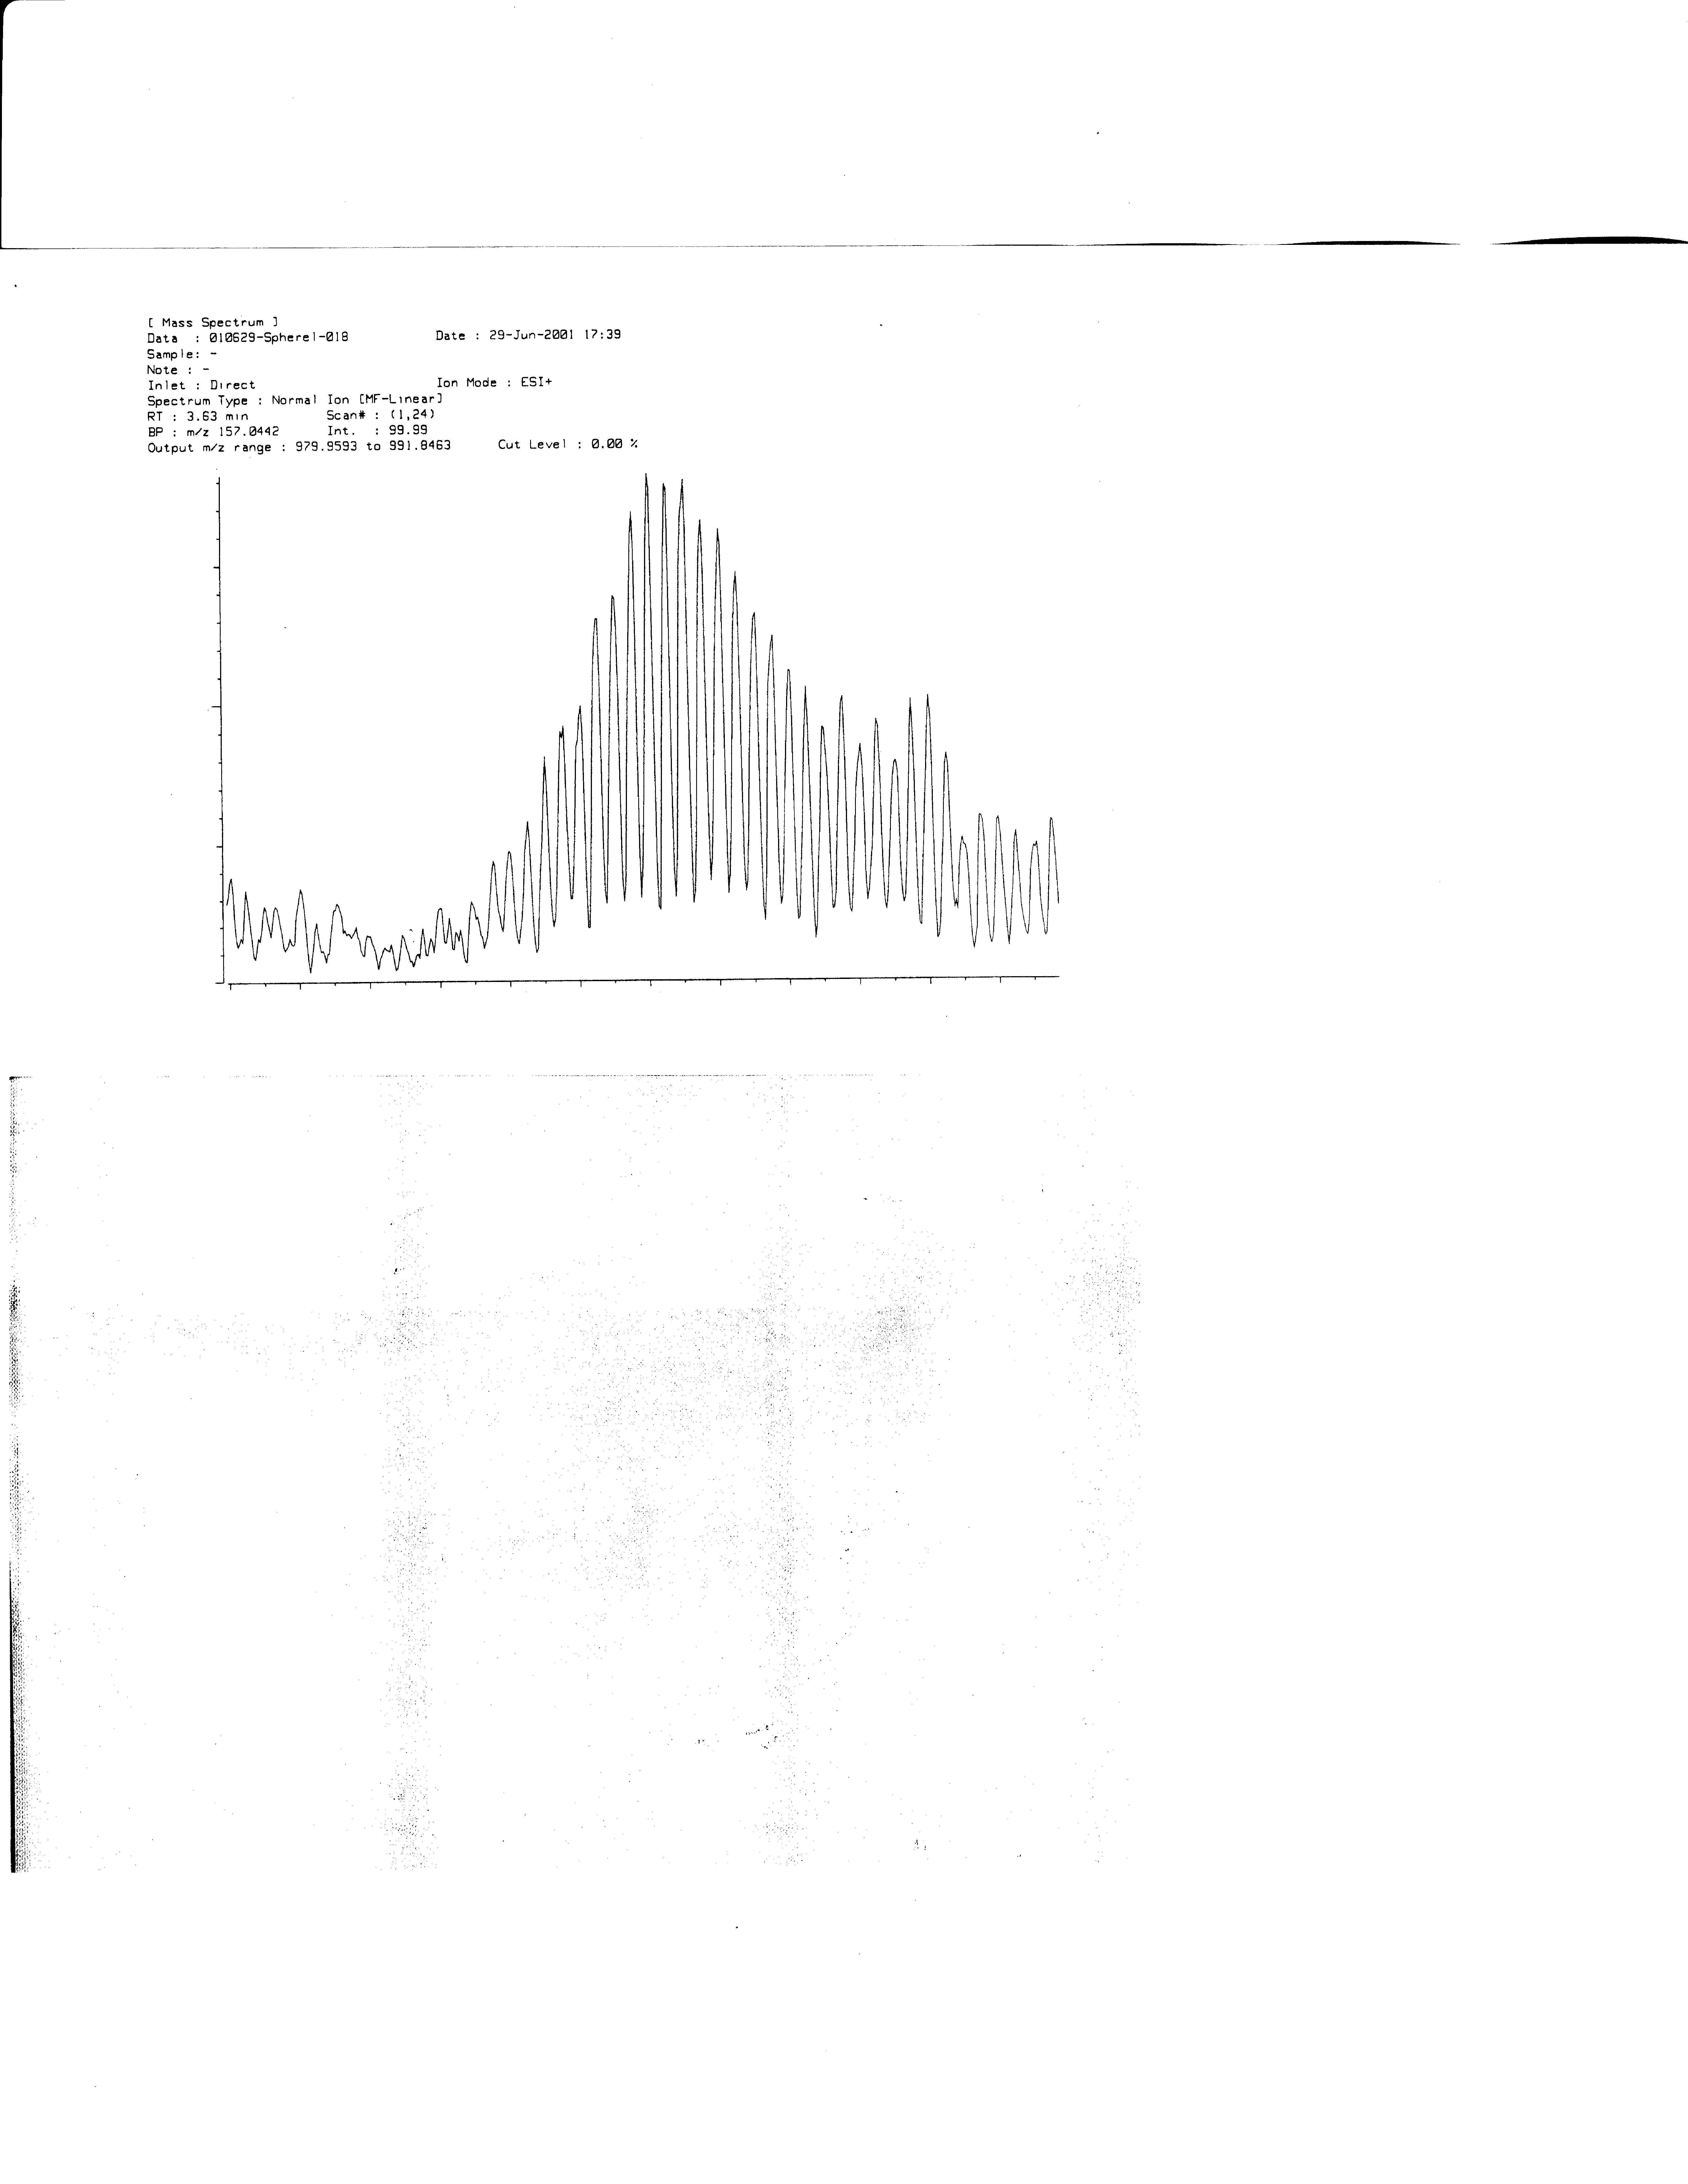


980 984 988 992 *m/Z*

Relative intensity

0 10 20 30

*m/z* = 985

[**2**-(NO3)4]4+

**Fig S8 (d)**


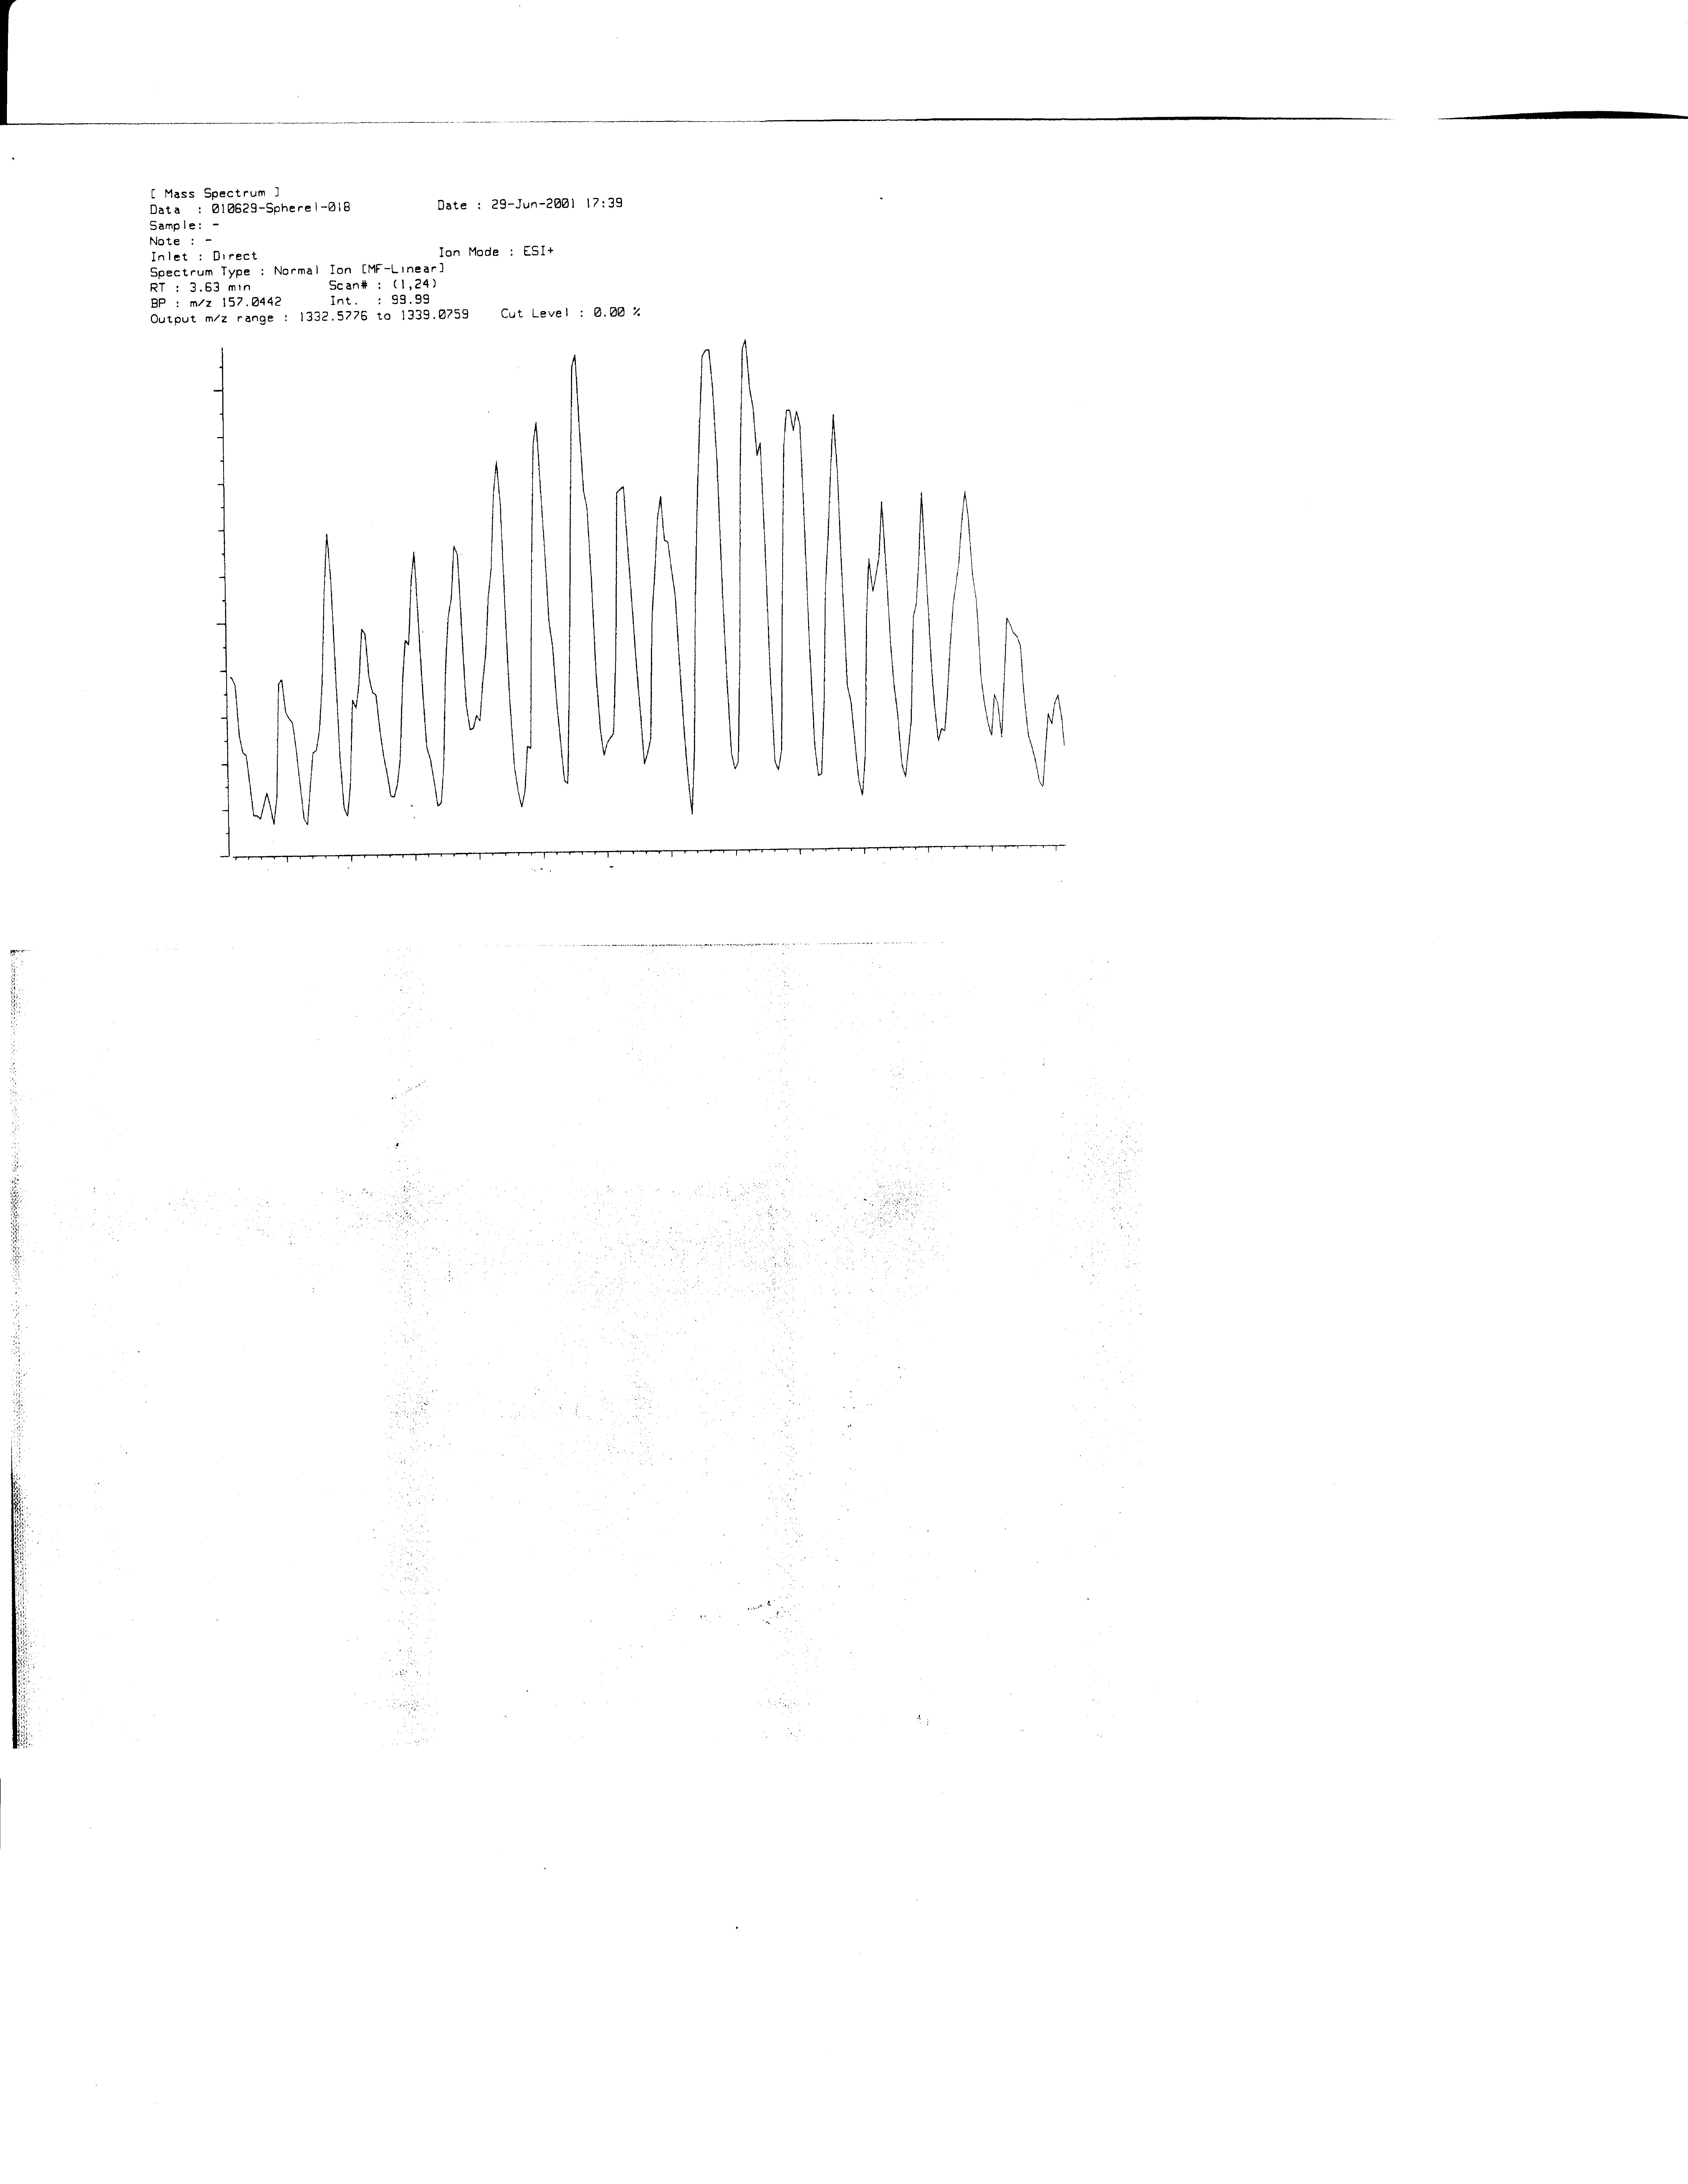


1333 1335 1337 1339 *m/Z*

Relative intensity

0 5 10

*m/z* = 1335 [**2**-(NO3)3]3+

**Figure S8**. CSI MS of the sphere **2** in DMSO. (*m/z* = 1335: [**2**-(NO3)3]3+; *m/z* = 985:[**2**-(NO3)4]4+; *m/z* = 776: [**2**-(NO3)5]5+ and *m/z* = 701: [(**2**-(NO3)6)+5 DMSO]6+.
